# Supplementary material for: Gold-catalyzed tandem cyclization/Friedel–Crafts type reactions toward furan derivatives
Source: Royal Society of Chemistry journal article supplement (doi:10.1039/b905332h), 2009-01-01

# Gold-Catalyzed Tandem Cyclization/Friedel-Crafts Type

## Reactions toward Furan Derivatives

Ke-Gong Ji,<sup>a</sup> Xing-Zhong Shu,<sup>a</sup> Jin Chen,<sup>a</sup> Shu-Chun Zhao,<sup>a</sup> Zhao-Jing Zheng,<sup>a</sup>  
Xue-Yuan Liu,<sup>a</sup> Yong-Min Liang<sup>\*,a,b</sup>

<sup>a</sup> State Key Laboratory of Applied Organic Chemistry, Lanzhou University.

<sup>b</sup> State Key Laboratory of Solid Lubrication, Lanzhou Institute of Chemical Physics,  
Chinese Academy of Science

Lanzhou 730000, P.R. China. Fax: +86-931-8912582; Tel: +86-931-8912593

[liangym@lzu.edu.cn](mailto:liangym@lzu.edu.cn)

### General Remarks

Column chromatography was carried out on silica gel. <sup>1</sup>H NMR spectra were recorded on 300/400 MHz in CDCl<sub>3</sub> and <sup>13</sup>C NMR spectra were recorded on 75/100 MHz in CDCl<sub>3</sub>. IR spectra were recorded on a FT-IR spectrometer and only major peaks are reported in cm<sup>-1</sup>. Melting points were determined on a microscopic apparatus and were uncorrected. All compounds were further characterized by elemental analysis; copies of their <sup>1</sup>H NMR and <sup>13</sup>C NMR spectra are provided in the Supporting Information. Room temperature is 23–25°C. Commercially available reagents and solvents were used without further purification. THF was distilled immediately before use from Na/benzophenone.

**The known substrates 1a-1l were prepared according to the literature.<sup>1</sup>**

1. (a) X.-Z. Shu, X.-Y. Liu, H.-Q. Xiao, K.-G. Ji, L.-N. Guo, C.-Z. Qi, Y.-M. Liang, *Adv. Synth. Catal.* **2007**, *349*, 2493. (b) K.-G. Ji, Y.-W. Shen, X.-Z. Shu, H.-Q. Xiao, Y.-J. Bian, Y.-M. Liang, *Adv. Synth. Catal.* **2008**, *350*, 1275.

**The known nucleophiles were prepared according to the literature.<sup>2</sup>**

2. (a) P. Srivastava, R. Srivastava, *Tetrahedron Letters* **2007**, *48*, 4489. (b) D. A. Evans, G. Borg, K. A. Scheidt, *Angew. Chem., Int. Ed.* **2002**, *41*, 3188.

**General procedure A: Gold (III)-catalyzed reaction of 1-oxiranyl-2-alkynyl ester 1 with nucleophiles for synthesis of 4.**

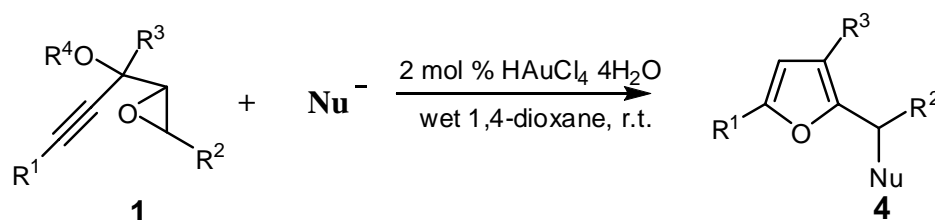

To a solution of esters of 1-oxiranyl-2-alkyn-1-ols **1** (0.50 mmol), **5** mmol of nucleophiles (10 equivs) in wet 1,4-dioxane (2.0 mL) was added 4.00 mg (0.01 mmol, 2 mol %) of  $\text{HAuCl}_4 \cdot 4\text{H}_2\text{O}$  under air at room temperature. When the reaction was considered complete as determined by TLC analysis, the reaction mixture was diluted with ethyl ether (40 mL), washed with water, saturated brine, dried over  $\text{Na}_2\text{SO}_4$  and evaporated under reduced pressure. The residue was purified by chromatography on silica gel to afford corresponding furan derivatives **4**.

#### Characterization Data of **4**.

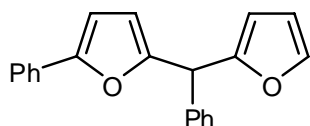

**2-(furan-2-yl(phenyl)methyl)-5-phenylfuran (4a):** Compound **4a** was isolated in 71 % yield as an oil following the general procedure **A**. Reaction time: 20 min.;  $^1\text{H}$  NMR (300 MHz,  $\text{CDCl}_3$ )  $\delta$  7.68-7.66 (d,  $J = 7.5$  Hz, 2H), 7.43-7.24 (m, 9 H), 6.65-6.63 (d,  $J = 3.6$  Hz, 1 H), 6.39-6.6.38 (dd,  $J = 3.3, 1.8$  Hz, 1 H), 6.15 (s, 2H), 5.58 (s, 1H).  $^{13}\text{C}$  NMR (75 MHz,  $\text{CDCl}_3$ )  $\delta$  154.3, 153.9, 153.3, 141.9, 139.4, 130.8, 128.5, 128.5, 128.3, 127.2, 127.1, 123.5, 110.2, 109.7, 107.6, 105.7, 45.1. IR (neat,  $\text{cm}^{-1}$ ) 2924, 1450, 1163, 1018, 694. Anal.Calcd for  $\text{C}_{21}\text{H}_{16}\text{O}_2$ : C, 83.98; H, 5.37. Found: C, 83.82; H, 5.30.

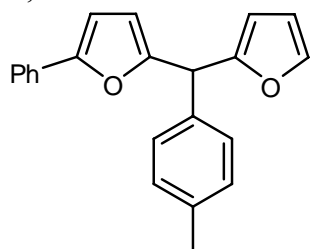

**2-(furan-2-yl(p-tolyl)methyl)-5-phenylfuran (4b):** Compound **4b** was isolated in 73 % yield as an oil following the general procedure **A**. Reaction time: 10 min.;  $^1\text{H}$  NMR (300 MHz,  $\text{CDCl}_3$ )  $\delta$  7.61-7.58 (d,  $J = 7.5$  Hz, 2H), 7.35-7.11(m, 8 H), 6.57-6.55(t,  $J = 3.0$  Hz, 1 H), 6.31-6.30(dd,  $J = 3.0, 1.2$  Hz, 1 H), 6.08-6.06(t,  $J = 3.0$  Hz, 2 H), 5.47(s, 1H), 2.32(s, 3H)  $^{13}\text{C}$  NMR (75 MHz,  $\text{CDCl}_3$ )  $\delta$  154.6, 154.2, 153.2, 141.9, 136.8, 136.4, 130.9, 129.2, 128.6, 128.2, 127.1, 123.6, 110.2, 109.6, 107.5, 105.7, 44.8, 21.1. IR (neat,  $\text{cm}^{-1}$ ) 2921, 1509, 1208, 1018, 762. Anal.Calcd for  $\text{C}_{22}\text{H}_{18}\text{O}_2$ : C, 84.05; H, 5.77. Found: C, 84.02; H, 5.73.

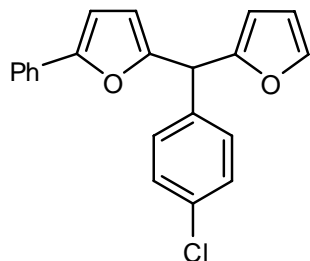

**2-((4-chlorophenyl)(furan-2-yl)methyl)-5-phenylfuran (4c):** Compound **4c** was isolated in 70 % yield as an oil following the general procedure **A**. Reaction time: 10 min.;  $^1\text{H}$  NMR (300 MHz,  $\text{CDCl}_3$ )  $\delta$  7.51-7.49 (d,  $J = 7.8$  Hz, 2H), 7.26-7.18(m, 5 H),

7.14-7.09(m, 3 H), 6.48-6.47(d,  $J = 3.0$  Hz, 1 H), 6.24-6.22(t,  $J = 3.0$  Hz, 1 H), 6.00-5.99(d,  $J = 2.4$  Hz, 2 H), 5.38(s, 1H)  $^{13}\text{C}$  NMR (75 MHz,  $\text{CDCl}_3$ )  $\delta$  153.7, 153.5, 153.3, 142.1, 137.9, 133.0, 130.7, 129.7, 128.7, 128.6, 127.2, 123.5, 110.3, 109.8, 107.7, 105.6, 44.5. IR (neat,  $\text{cm}^{-1}$ ) 2926, 1594, 1543, 1488, 1017, 761. Anal. Calcd for  $\text{C}_{21}\text{H}_{15}\text{ClO}_2$ : C, 75.34; H, 4.52. Found: C, 75.39; H, 4.63.

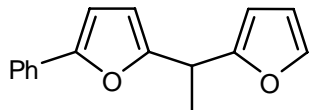

**2-(1-(furan-2-yl)ethyl)-5-phenylfuran (4d):** Compound **4d** was isolated in 50 % yield as an oil following the general procedure **A**. Reaction time: 20 min.;  $^1\text{H}$  NMR (400 MHz,  $\text{CDCl}_3$ )  $\delta$  7.64-7.61(dd,  $J = 7.6, 1.6$  Hz, 2H), 7.37-7.33(m, 3 H), 7.24-7.20 (m, 1 H), 6.57-6.56 (d,  $J = 3.2$  Hz, 1 H), 6.32-6.30(dd,  $J = 3.2, 2.0$  Hz, 2H), 6.12-6.09 (m, 2 H), 4.31-4.25 (q,  $J = 7.2$  Hz, 1 H), 1.66-1.65 (d,  $J = 7.2$  Hz, 3 H).  $^{13}\text{C}$  NMR (100 MHz,  $\text{CDCl}_3$ )  $\delta$  156.4, 156.2, 152.7, 141.3, 131.1, 128.6, 127.0, 123.5, 110.1, 107.1, 105.6, 105.1, 33.3, 18.1. IR (neat,  $\text{cm}^{-1}$ ) 2980, 2935, 1545, 1485, 1015, 760. Anal. Calcd for  $\text{C}_{16}\text{H}_{14}\text{O}_2$ : C, 80.65; H, 5.92. Found: C, 80.60; H, 4.88.

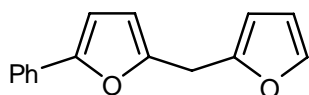

**2-(furan-2-ylmethyl)-5-phenylfuran (4e):** Compound **4e** was isolated in 43 % yield as an oil following the general procedure **A**. Reaction time: 20 min.;  $^1\text{H}$  NMR (400 MHz,  $\text{CDCl}_3$ )  $\delta$  7.64-7.61(d,  $J = 7.6$  Hz, 2 H), 7.36-7.33(t,  $J = 7.6$  Hz, 3 H) 7.25-7.20 (m, 1 H), 6.57-6.56 (d,  $J = 3.2$  Hz, 1 H), 6.31(s, 1 H), 6.16-6.13 (dd,  $J = 8.0, 3.2$  Hz, 2H), 4.07(s, 2 H).  $^{13}\text{C}$  NMR (100 MHz,  $\text{CDCl}_3$ )  $\delta$  153.1, 151.5, 151.3, 141.6, 131.0, 128.6, 127.0, 123.5, 110.4, 108.6, 106.6, 105.8, 28.4. IR (neat,  $\text{cm}^{-1}$ ) 2924, 1597, 1459, 1017, 758. Anal. Calcd for  $\text{C}_{16}\text{H}_{14}\text{O}_2$ : C, 80.34; H, 5.39. Found: C, 80.50; H, 4.51.

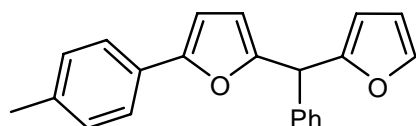

**2-(furan-2-yl(phenyl)methyl)-5-p-tolylfuran (4f):** Compound **4f** was isolated in 68 % yield as an oil following the general procedure **A**. Reaction time: 10 min.;  $^1\text{H}$  NMR (300 MHz,  $\text{CDCl}_3$ )  $\delta$  7.51-7.48(d,  $J = 8.1$  Hz, 2 H), 7.36-7.35(d,  $J = 1.2$  Hz, 1 H), 7.32-7.30 (m, 5 H), 7.14-7.12 (d,  $J = 8.1$  Hz, 2 H), 6.51-6.50 (d,  $J = 2.7$  Hz, 1 H), 6.32-6.30 (dd,  $J = 3.0, 1.8$  Hz, 1 H), 6.08-6.06 (t,  $J = 3.0$  Hz, 2 H), 5.50(s, 1 H), 2.32 (s, 3H).  $^{13}\text{C}$  NMR (75 MHz,  $\text{CDCl}_3$ )  $\delta$  154.4, 153.5, 153.5, 141.9, 139.5, 136.9, 129.2, 128.5, 128.4, 128.2, 127.1, 123.6, 110.2, 109.6, 107.6, 104.9, 45.1, 21.2. IR (neat,  $\text{cm}^{-1}$ ) 3027, 2921, 1498, 1016, 730. Anal. Calcd for  $\text{C}_{22}\text{H}_{18}\text{O}_2$ : C, 84.05; H, 5.77. Found: C, 84.01; H, 5.70.

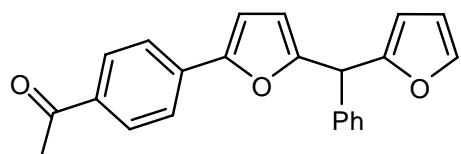

**1-(4-(5-(furan-2-yl(phenyl)methyl)furan-2-yl)phenyl)ethanone (4g):** Compound **4g** was isolated in 58 % yield as an oil following the general procedure **A**. Reaction time: 50 min.;  $^1\text{H}$  NMR (300 MHz,  $\text{CDCl}_3$ )  $\delta$  7.94-7.91(dd,  $J = 9.0, 1.2$  Hz, 2 H), 7.68-7.64 (dd,  $J = 8.7, 1.2$  Hz, 2 H), 7.38 (s, 1 H), 7.34-7.24 (m, 5 H), 6.73-6.72 (t, 1H), 6.34-6.33(dd,  $J = 2.7, 1.8$  Hz, 1 H), 6.15-6.14 (d,  $J = 3.0$  Hz, 1 H), 6.09-6.08 (t, 1H), 5.53 (s, 1 H), 2.57(s, 3 H).  $^{13}\text{C}$  NMR (75 MHz,  $\text{CDCl}_3$ )  $\delta$  197.3, 155.4, 153.9, 152.2, 142.1, 139.1, 135.3, 134.8, 128.9, 128.6, 128.3, 127.3, 123.3, 110.3, 110.2, 108.3, 107.7, 45.2, 26.5. IR (neat,  $\text{cm}^{-1}$ ) 2922, 1679, 1607, 1266, 1016, 731. Anal.Calcd for  $\text{C}_{22}\text{H}_{18}\text{O}_2$ : C, 80.68 ; H, 5.30. Found: C, 80.60; H, 5.22.

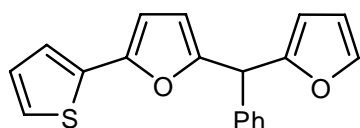

**2-(furan-2-yl(phenyl)methyl)-5-(thiophen-2-yl)furan (4h):** Compound **4h** was isolated in 60 % yield as an oil following the general procedure **A**. Reaction time: 10 min.;  $^1\text{H}$  NMR (300 MHz,  $\text{CDCl}_3$ )  $\delta$  7.36 (s, 1H), 7.33-7.23(m, 5 H), 7.18-7.15(m, 2 H), 7.00-6.97(m, 1 H), 6.42-6.41(d,  $J = 3.6$  Hz, 1 H), 6.33-6.31 (dd,  $J = 3.0, 1.8$  Hz, 1 H), 6.08-6.04(m, 2 H), 5.48 (s, 1 H).  $^{13}\text{C}$  NMR (75 MHz,  $\text{CDCl}_3$ )  $\delta$  154.2, 153.6, 148.8, 142.0, 128.5, 128.4, 127.5, 127.2, 123.8, 122.4, 110.3, 109.7, 107.7, 105.8, 45.1. IR (neat,  $\text{cm}^{-1}$ ) 3114, 1598, 1499, 1013, 730, 697. Anal.Calcd for  $\text{C}_{14}\text{H}_{19}\text{O}_2\text{S}$ : C, 74.48; H, 4.61. Found: C, 74.40; H, 4.55.

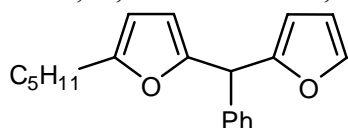

**2-(furan-2-yl(phenyl)methyl)-5-pentylfuran (4i):** Compound **4i** was isolated in 41 % yield as an oil following the general procedure **A**. Reaction time: 60 min.;  $^1\text{H}$  NMR (400 MHz,  $\text{CDCl}_3$ )  $\delta$  7.34-7.23 (m, 6 H), 6.31-6.29(dd,  $J = 2.8, 2.0$ Hz, 1 H), 6.01-6.00 (d,  $J = 3.2$  Hz, 1 H), 5.89-5.86 (dd,  $J = 8.4, 3.2$  Hz, 2 H), 5.39 (s, 1 H) 2.58-2.54(t,  $J = 7.6$  Hz, 2 H), 1.68-1.61(m, 2 H), 1.48-1.32(m, 4 H), 0.95-0.91(t,  $J = 7.2$  Hz, 3 H).  $^{13}\text{C}$  NMR (100 MHz,  $\text{CDCl}_3$ )  $\delta$  156.1, 154.8, 152.2, 141.8, 139.8, 128.4, 128.4, 127.0, 110.2, 108.0, 107.4, 105.2, 45.1, 31.9, 29.7, 27.7, 22.7, 14.1. IR (neat,  $\text{cm}^{-1}$ ) 2926, 1560, 1499, 1458, 1013, 800, 730. Anal.Calcd for  $\text{C}_{20}\text{H}_{22}\text{O}_2$ : C, 81.60; H, 7.53. Found: C, 81.70; H, 7.66.

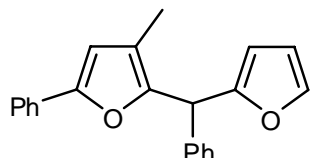

**2-(furan-2-yl(phenyl)methyl)-3-methyl-5-phenylfuran (4j):** Compound **4j** was isolated in 72 % yield as an oil following the general procedure **A**. Reaction time: 10 min.;  $^1\text{H}$  NMR (300 MHz,  $\text{CDCl}_3$ )  $\delta$  7.58-7.55(dd,  $J = 8.1, 1.2$  Hz, 2 H), 7.35-7.17(m, 9 H), 6.46(s, 1 H), 6.31-6.29(dd,  $J = 3.0, 1.8$  Hz, 1 H), 6.09-6.08(d,  $J = 3.3$  Hz, 1 H), 5.50 (s, 1 H), 1.93(s, 3 H).  $^{13}\text{C}$  NMR (75 MHz,  $\text{CDCl}_3$ )  $\delta$  154.5, 151.9, 148.2, 141.7, 139.7, 130.9, 128.5, 128.5, 128.3, 126.9, 126.9, 123.4, 117.9, 110.2, 108.7, 107.8,

43.2, 9.8. IR (neat,  $\text{cm}^{-1}$ ) 2924, 1601, 1489, 1450, 1175, 1011, 735. Anal.Calcd for  $\text{C}_{22}\text{H}_{18}\text{O}_2$ : C, 84.05; H, 5.77. Found: C, 84.00; H, 5.71.

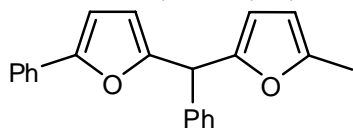

**2-methyl-5-(phenyl(5-phenylfuran-2-yl)methyl)furan (4aa):** Compound **4aa** was isolated in 73 % yield as an oil following the general procedure **A**. Reaction time: 30 min.;  $^1\text{H}$  NMR (300 MHz,  $\text{CDCl}_3$ )  $\delta$  7.61-7.58 (dd,  $J = 8.7, 1.5$  Hz, 2 H), 7.34-7.19(m, 8 H), 6.56-6.55(d,  $J = 3.6$  Hz, 1 H), 6.08-6.07(d,  $J = 3.6$  Hz, 1 H), 5.93-5.91(d,  $J = 3.6$  Hz, 1 H), 5.89-5.88 (d,  $J = 3.6$  Hz, 1 H), 5.45 (s, 1 H), 2.24 (s, 3 H).  $^{13}\text{C}$  NMR (75 MHz,  $\text{CDCl}_3$ )  $\delta$  154.3, 153.2, 152.5, 151.5, 139.7, 130.9, 128.5, 128.5, 128.4, 127.0, 123.6, 109.6, 108.4, 106.1, 105.7, 45.2, 13.6. IR (neat,  $\text{cm}^{-1}$ ) 3029, 1544, 1489, 1450, 1215, 1022, 760, 695. Anal.Calcd for  $\text{C}_{22}\text{H}_{18}\text{O}_2$ : C, 84.05; H, 5.77. Found: C, 83.97; H, 5.68.

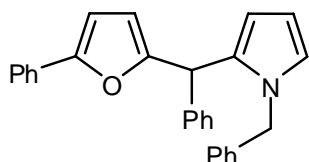

**1-benzyl-2-(phenyl(5-phenylfuran-2-yl)methyl)-1H-pyrrole(4ab):** Compound **4ab** was isolated in 81% yield as an oil following the general procedure **A**. Reaction time: 15 min.;  $^1\text{H}$  NMR (300 MHz,  $\text{CDCl}_3$ )  $\delta$  7.57-7.55(d,  $J = 6.9$  Hz, 2 H), 7.33-7.12(m, 11 H), 6.95-6.93 (d,  $J = 7.2$  Hz, 2 H), 6.65-6.64 (d,  $J = 2.4$  Hz, 1 H), 6.52-6.51 (d,  $J = 3.6$  Hz, 1 H), 6.14-6.12 (t, 1 H), 5.91-5.90 (d,  $J = 3.6$  Hz, 1 H), 5.84-5.83 (d,  $J = 1.8$  Hz, 1 H), 5.26 (s, 1 H), 4.90(s, 1 H), 4.88 (s, 1 H).  $^{13}\text{C}$  NMR (75 MHz,  $\text{CDCl}_3$ )  $\delta$  155.3, 153.1, 140.4, 138.1, 132.4, 130.9, 128.7, 128.5, 128.4, 127.4, 127.0, 126.9, 126.4, 123.5, 122.0, 109.9, 109.4, 107.1, 105.6, 50.5, 43.3. IR (neat,  $\text{cm}^{-1}$ ) 3029, 2925, 1711, 1543, 1489, 1450, 1293, 1074, 1022, 760, 714, 697. Anal.Calcd for  $\text{C}_{28}\text{H}_{23}\text{NO}$ : C, 86.34; H, 5.95; N, 3.60; Found: C, 86.22; H, 5.88; N, 3.48.

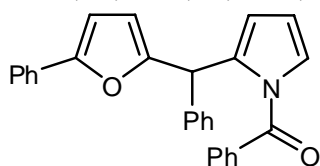

**phenyl(2-(phenyl(5-phenylfuran-2-yl)methyl)-1H-pyrrol-1-yl)methanone(4ac):** Compound **4ac** was isolated in 57 % yield as an oil following the general procedure **A**. Reaction time: 60 min.;  $^1\text{H}$  NMR (300 MHz,  $\text{CDCl}_3$ )  $\delta$  7.61-7.58 (dd,  $J = 7.2, 1.5$  Hz, 4 H), 7.50-7.16(m, 11 H), 6.82(s, 1 H), 6.54-6.52 (t,  $J = 3.6$  Hz, 1 H), 6.38(s, 1 H), 6.12-6.11(d,  $J = 3.6$  Hz, 1 H), 6.03 (s, 1 H), 5.96-5.95(t,  $J = 2.7$  Hz, 1 H).  $^{13}\text{C}$  NMR (75 MHz,  $\text{CDCl}_3$ )  $\delta$  169.1, 155.6, 153.0, 140.6, 136.4, 134.0, 132.3, 130.9, 129.7, 128.6, 128.5, 128.3, 128.2, 126.9, 126.8, 124.2, 123.5, 115.2, 110.2, 109.7, 105.6, 44.2. IR (neat,  $\text{cm}^{-1}$ ) 3030, 1696, 1598, 1487, 1325, 1128, 1023, 876, 696. Anal.Calcd for  $\text{C}_{28}\text{H}_{21}\text{NO}_2$ : C, 83.35; H, 5.25; N, 3.47; Found: C, 83.30; H, 5.22; N, 3.41.

**General procedure B: Gold (III)-catalyzed reaction of 1-oxiranyl-2-alkynyl ester 1 with nucleophiles in water at 80 °C for**

## synthesis of 4ad-4af.

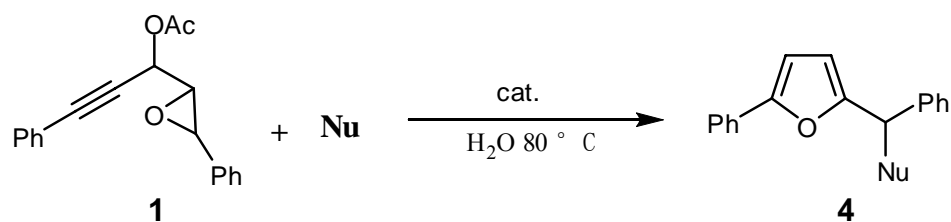

Nu: 1H-indole, pentane-2,4-dione, NaN<sub>3</sub>

To a solution of esters of 1-oxiranyl-2-alkyn-1-ols **1a** (0.50 mmol), **0.60** mmol of nucleophiles (1.2 equivs) in water (0.8 mL) was added 10.00 mg (0.01 mmol, 5 mol %) of HAuCl<sub>4</sub>·4H<sub>2</sub>O at 80°C. When the reaction was considered complete as determined by TLC analysis, the reaction mixture was diluted with ethyl ether (40 mL), washed with water, saturated brine, dried over Na<sub>2</sub>SO<sub>4</sub> and evaporated under reduced pressure. The residue was purified by chromatography on silica gel to afford corresponding furan derivatives **4**.

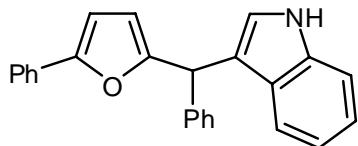

**3-(phenyl(5-phenylfuran-2-yl)methyl)-1H-indole(4ad):** Compound **4ad** was isolated in 51 % yield as an oil following the general procedure **B**. Reaction time: 10h.; <sup>1</sup>H NMR (300 MHz, CDCl<sub>3</sub>) δ 7.85 (s, 1 H), 7.60-7.58 (d, *J* = 7.8 Hz, 2 H), 7.40-7.37 (d, *J* = 8.1 Hz, 1 H), 7.34-7.12 (m, 10 H), 7.04-6.99(t, *J* = 7.5 Hz, 1 H), 6.77-6.76 (d, *J* = 2.1 Hz, 1 H), 6.56-6.54 (d, *J* = 3.3 Hz, 1 H), 6.02-6.01(d, *J* = 3.0 Hz, 1 H), 5.71(s, 1 H). <sup>13</sup>C NMR (75 MHz, CDCl<sub>3</sub>) δ 156.6, 152.9, 141.8, 136.5, 131.1, 128.6, 128.5, 128.4, 126.9, 126.7, 126.6, 123.5, 123.3, 122.1, 119.6, 119.5, 117.4, 111.1, 109.6, 105.7, 42.8. IR (neat, cm<sup>-1</sup>) 3422, 1739, 1453, 1021, 740. Anal.Calcd for C<sub>25</sub>H<sub>19</sub>NO: C, 85.93; H, 5.48; N, 4.01; Found: C, 85.88; H, 5.39; N, 3.97.

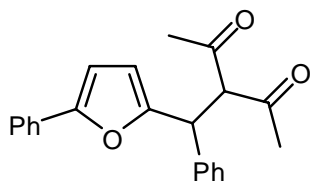

**3-(phenyl(5-phenylfuran-2-yl)methyl)pentane-2,4-dione(4ae):** Compound **4ae** was isolated in 38 % yield as a solid following the general procedure **B**, along with 20 % **6a** was isolated. Reaction time: 8h. mp = 97-99 °C; <sup>1</sup>H NMR (300 MHz, CDCl<sub>3</sub>) δ 7.58-7.55 (d, *J* = 7.5 Hz, 2 H), 7.38-7.20 (m, 8 H), 6.51-6.49 (d, *J* = 3.6 Hz, 1 H), 6.08-6.07 (d, *J* = 3.6 Hz, 1 H), 4.94-4.90 (d, *J* = 12.3 Hz, 1 H), 4.69-4.65 (d, *J* = 11.7 Hz, 1 H), 2.21(s, 3 H), 1.96(s, 3 H). <sup>13</sup>C NMR (75 MHz, CDCl<sub>3</sub>) δ 202.1, 202.0, 153.8, 153.4, 138.6, 130.6, 128.9, 128.7, 128.3, 127.5, 127.3, 123.5, 109.1, 105.8, 73.4, 45.2, 30.1, 29.1. IR (neat, cm<sup>-1</sup>) 2921, 1732, 1700, 1356, 1022, 761, 697. Anal.Calcd for C<sub>22</sub>H<sub>20</sub>O<sub>3</sub>: C, 79.50; H, 6.06; Found: C, 79.45; H, 5.98.

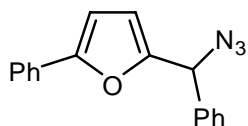

**2-(azido(phenyl)methyl)-5-phenylfuran (4af):** Compound **4af** was isolated in 46 % yield as an oil following the general procedure **B**. Reaction time: 8h.;  $^1\text{H}$  NMR (300 MHz,  $\text{CDCl}_3$ )  $\delta$  7.57-7.55(d,  $J = 7.5$  Hz, 2 H), 7.50-7.47(d,  $J = 6.9$  Hz, 1 H), 7.34-7.29(m, 5 H), 7.20-7.14(m, 2 H), 6.51-6.50 (d,  $J = 3.3$  Hz, 1 H), 6.16-6.15(d,  $J = 3.0$  Hz, 1 H), 5.62(s, 1 H).  $^{13}\text{C}$  NMR (75 MHz,  $\text{CDCl}_3$ )  $\delta$  154.6, 151.7, 136.7, 130.4, 128.7, 128.5, 127.7, 127.4, 125.3, 123.9, 111.0, 105.5, 62.3 IR (neat,  $\text{cm}^{-1}$ ) 3062, 2096, 1600, 1487, 1451, 1238, 1024, 761, 696. Anal.Calcd for  $\text{C}_{17}\text{H}_{13}\text{N}_3\text{O}$ : C, 74.17; H, 4.76; N, 15.26; Found: C, 74.03; H,4.66; N,15.11.

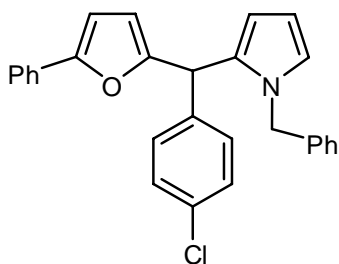

**1-benzyl-2-((4-chlorophenyl)(5-phenylfuran-2-yl)methyl)-1H-pyrrole (4ag):** Compound **4ag** was isolated in 79% yield as an oil following the general procedure **A**.  $^1\text{H}$  NMR (300 MHz,  $\text{CDCl}_3$ )  $\delta$  7.49-7.46 (d,  $J = 7.5$  Hz, 2 H), 7.23-7.09 (m, 9 H), 6.97-6.94 (d,  $J = 8.4$  Hz, 2 H), 6.86-6.84 (d,  $J = 6.3$  Hz, 1 H), 6.59(s, 1 H), 6.44-6.32 (d,  $J = 3.6$  Hz, 1 H), 6.05-6.04 (d,  $J = 2.7$  Hz, 1 H), 5.83-5.81 (d,  $J = 4.2$  Hz, 1 H), 5.74-5.73 (t,  $J = 1.8$  Hz, 1 H), 5.14 (s, 1 H), 4.83 (s, 1 H), 4.81 (s, 1 H).  $^{13}\text{C}$  NMR (75 MHz,  $\text{CDCl}_3$ )  $\delta$  154.7, 153.3, 139.0, 138.0, 132.7, 131.9, 130.8, 129.8, 128.7, 128.6, 127.5, 127.1, 126.5, 126.3, 123.5, 122.3, 110.0, 109.6, 107.2, 105.6, 50.6, 42.7. IR (neat,  $\text{cm}^{-1}$ ) 2923, 1489, 1451, 1292, 1019, 760, 714. Anal.Calcd for  $\text{C}_{28}\text{H}_{22}\text{ClNO}$ : C, 79.33; H, 5.23; N, 3.30; Found: C, 79.10; H,5.12; N, 3.18.

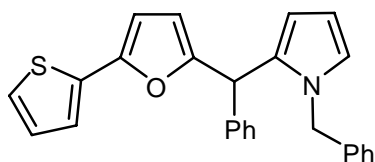

**1-benzyl-2-(phenyl(5-(thiophen-2-yl)furan-2-yl)methyl)-1H-pyrrole(4ah):** Compound **4ah** was isolated in 63 % yield as an oil following the general procedure **A**.  $^1\text{H}$  NMR (300 MHz,  $\text{CDCl}_3$ )  $\delta$  7.29-7.11 (m, 11 H), 6.97-6.93 (m, 2 H), 6.64(d,  $J = 2.4$  Hz, 1 H), 6.36-6.35 (d,  $J = 3.0$  Hz, 1 H), 6.12-6.11 (d,  $J = 3.0$  Hz, 1 H), 5.87-5.86 (d,  $J = 3.0$  Hz, 1 H), 5.83-5.82 (d,  $J = 1.8$  Hz, 1 H), 5.23 (s, 1 H), 4.90 (s, 1 H), 4.89(s, 1 H).  $^{13}\text{C}$  NMR (75 MHz,  $\text{CDCl}_3$ )  $\delta$  155.0, 148.6, 140.3, 138.1, 135.6, 133.9, 132.3, 128.7, 128.5, 128.4, 127.4, 127.2, 126.9, 126.5, 123.7, 122.2, 109.8, 109.4, 107.1, 105.7, 50.5, 43.2. IR (neat,  $\text{cm}^{-1}$ ) 3028, 2924, 1493, 1451, 1298, 1074, 1015, 782, 699. Anal.Calcd for  $\text{C}_{26}\text{H}_{21}\text{NOS}$ : C, 78.95; H, 5.35; N, 3.54; Found: C, 78.99; H, 5.19; N, 3.38.

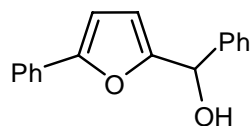

**phenyl(5-phenylfuran-2-yl)methanol (3a):**  $^1\text{H}$  NMR (300 MHz,  $\text{CDCl}_3$ )  $\delta$  7.63-7.61 (d,  $J = 7.8$  Hz, 2H), 7.47-7.45 (d,  $J = 7.2$  Hz, 2 H), 7.38-7.20 (m, 6 H), 6.55-6.54 (d,  $J = 3.6$  Hz, 1 H), 6.15-6.14 (d,  $J = 3.0$  Hz, 1 H), 5.84 (s), 2.64 (s);  $^{13}\text{C}$  NMR(75 MHz,  $\text{CDCl}_3$ )  $\delta$  155.4, 153.9, 140.7, 130.6, 128.6, 128.4, 128.0, 127.4, 126.6, 123.7, 109.6, 105.5, 70.2. IR (neat,  $\text{cm}^{-1}$ ) 2924, 1457, 1187, 1018, 689. Anal.Calcd for  $\text{C}_{17}\text{H}_{14}\text{O}_2$ : C, 81.58; H, 5.64. Found: C, 81.62; H, 5.67.



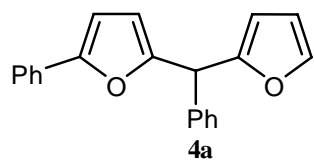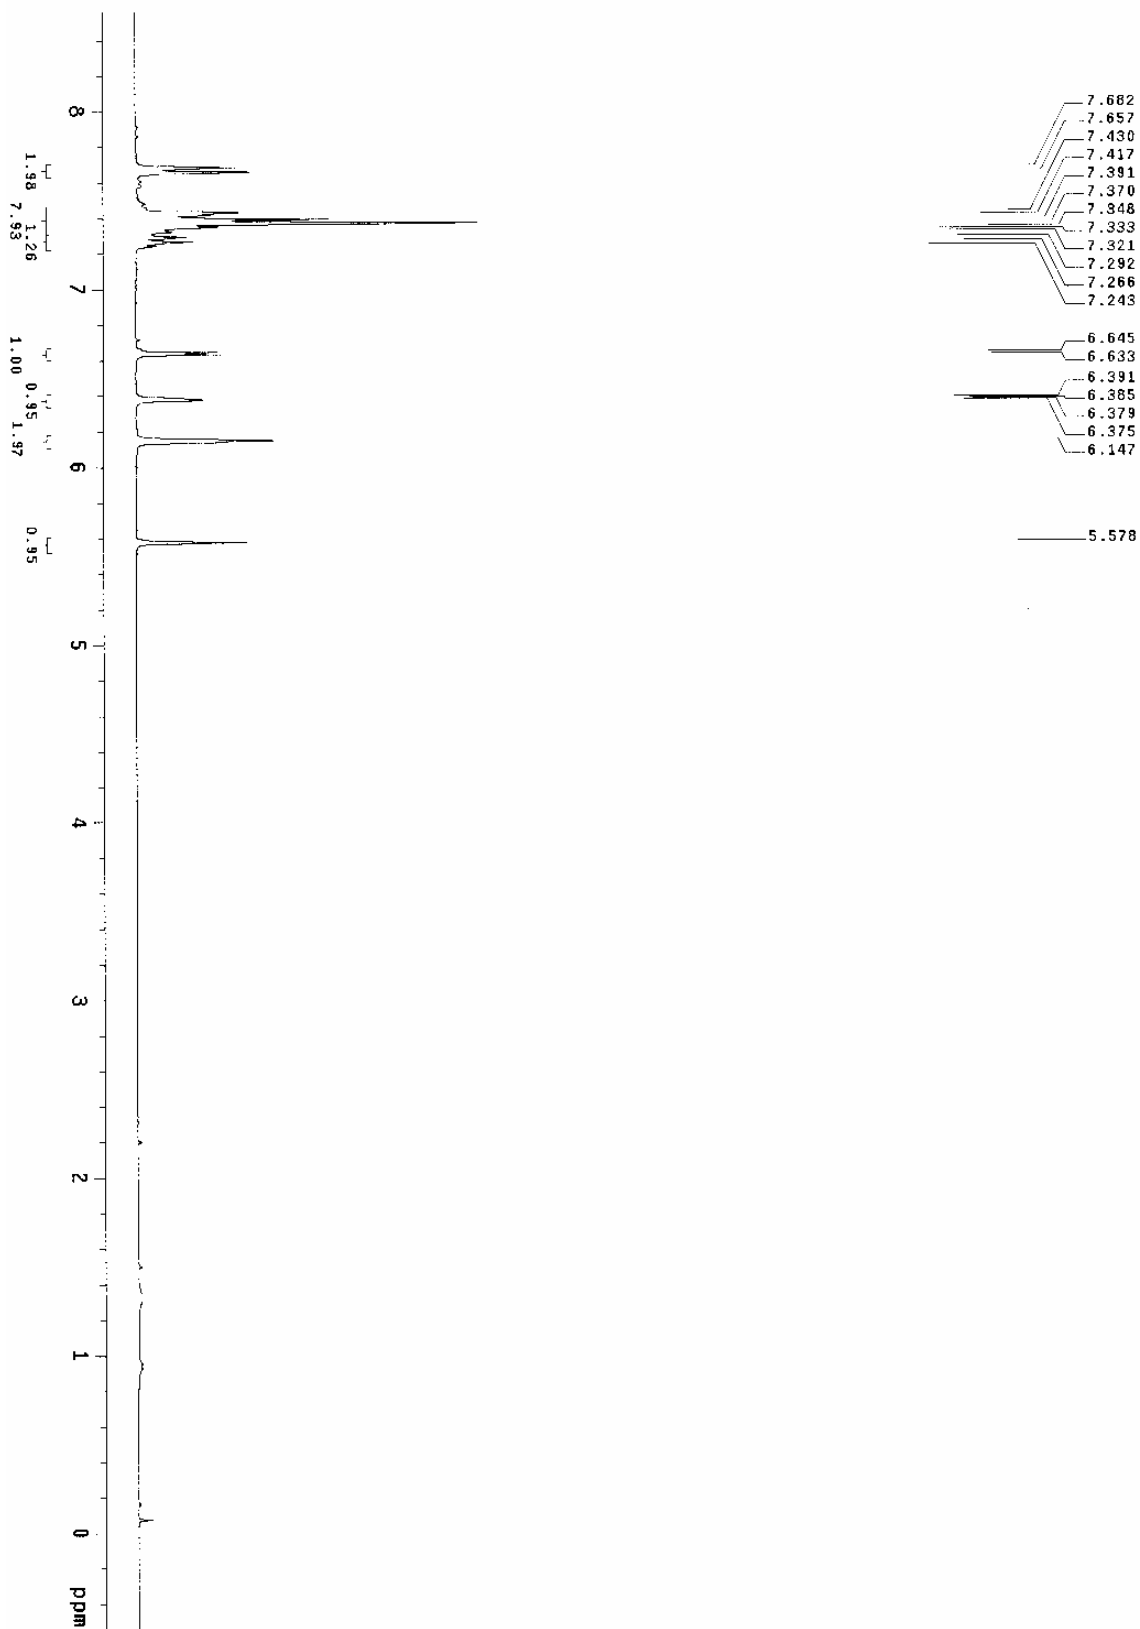

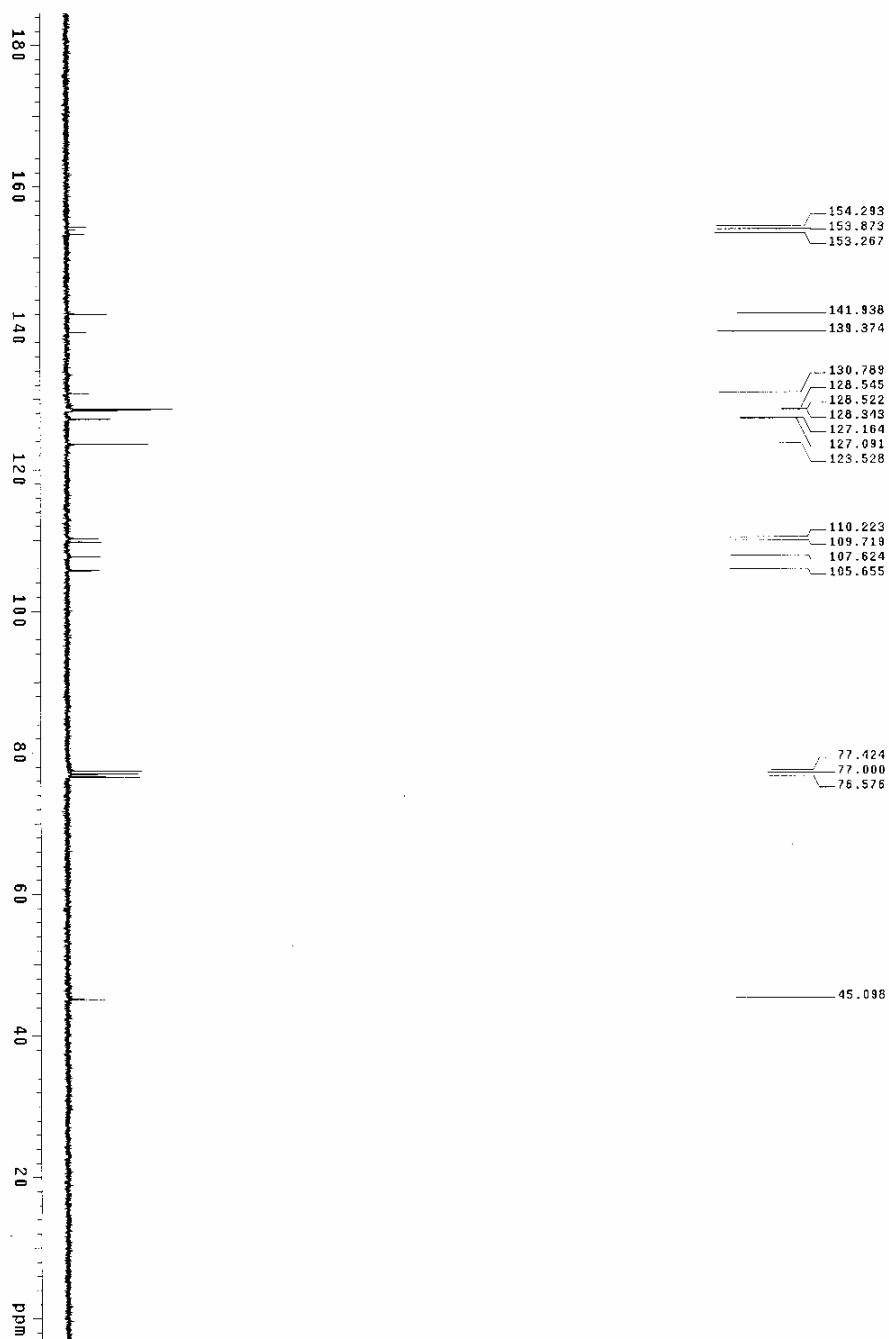

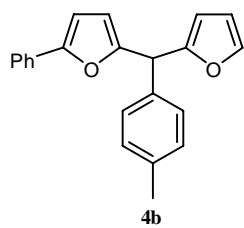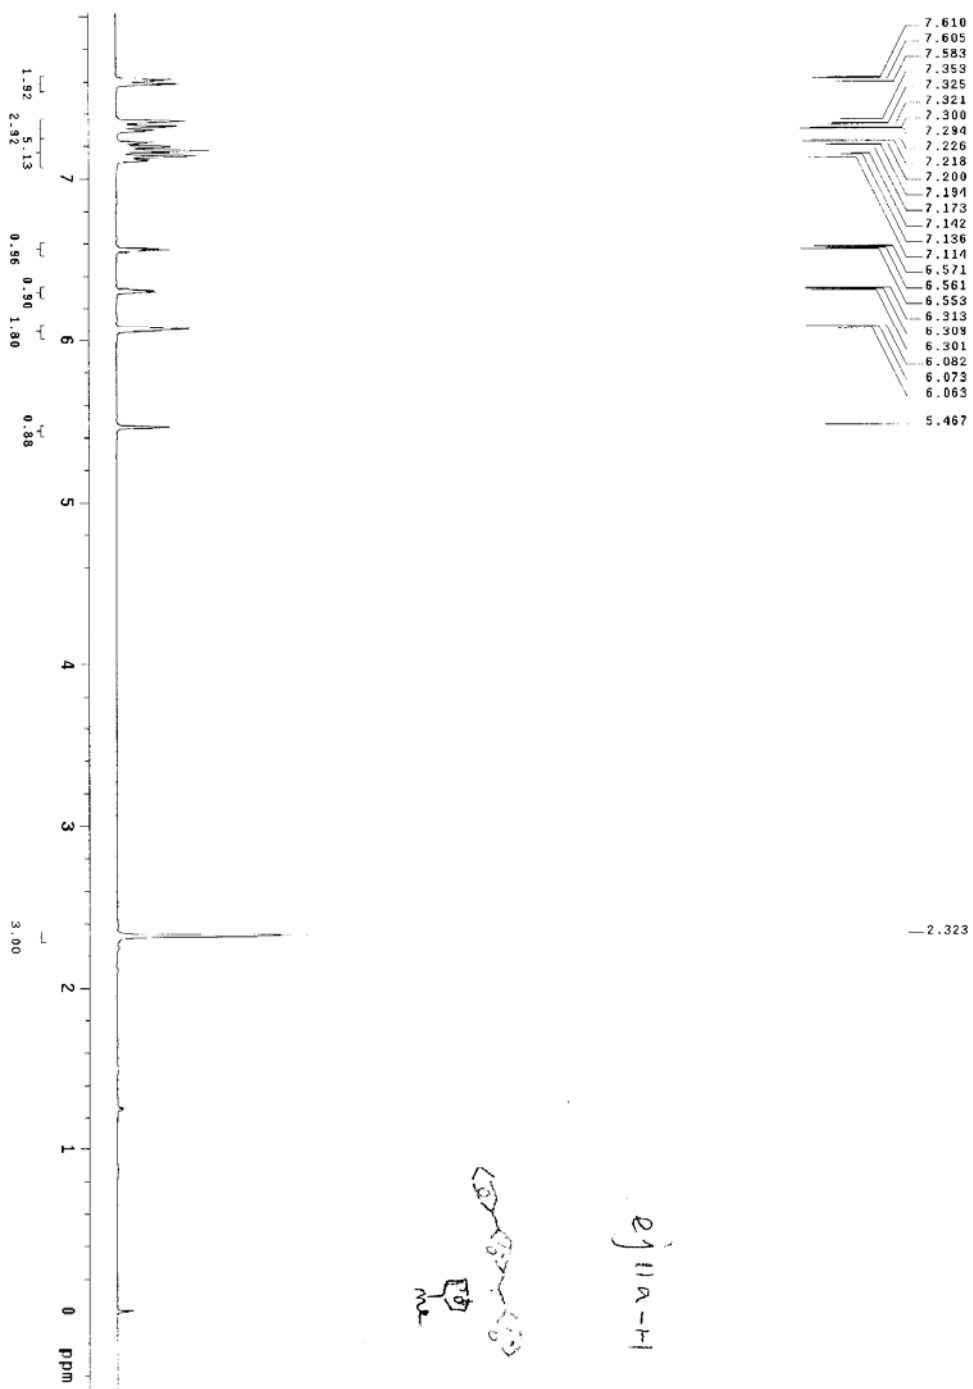

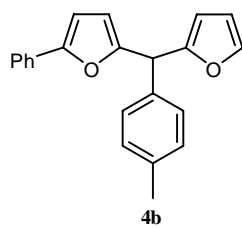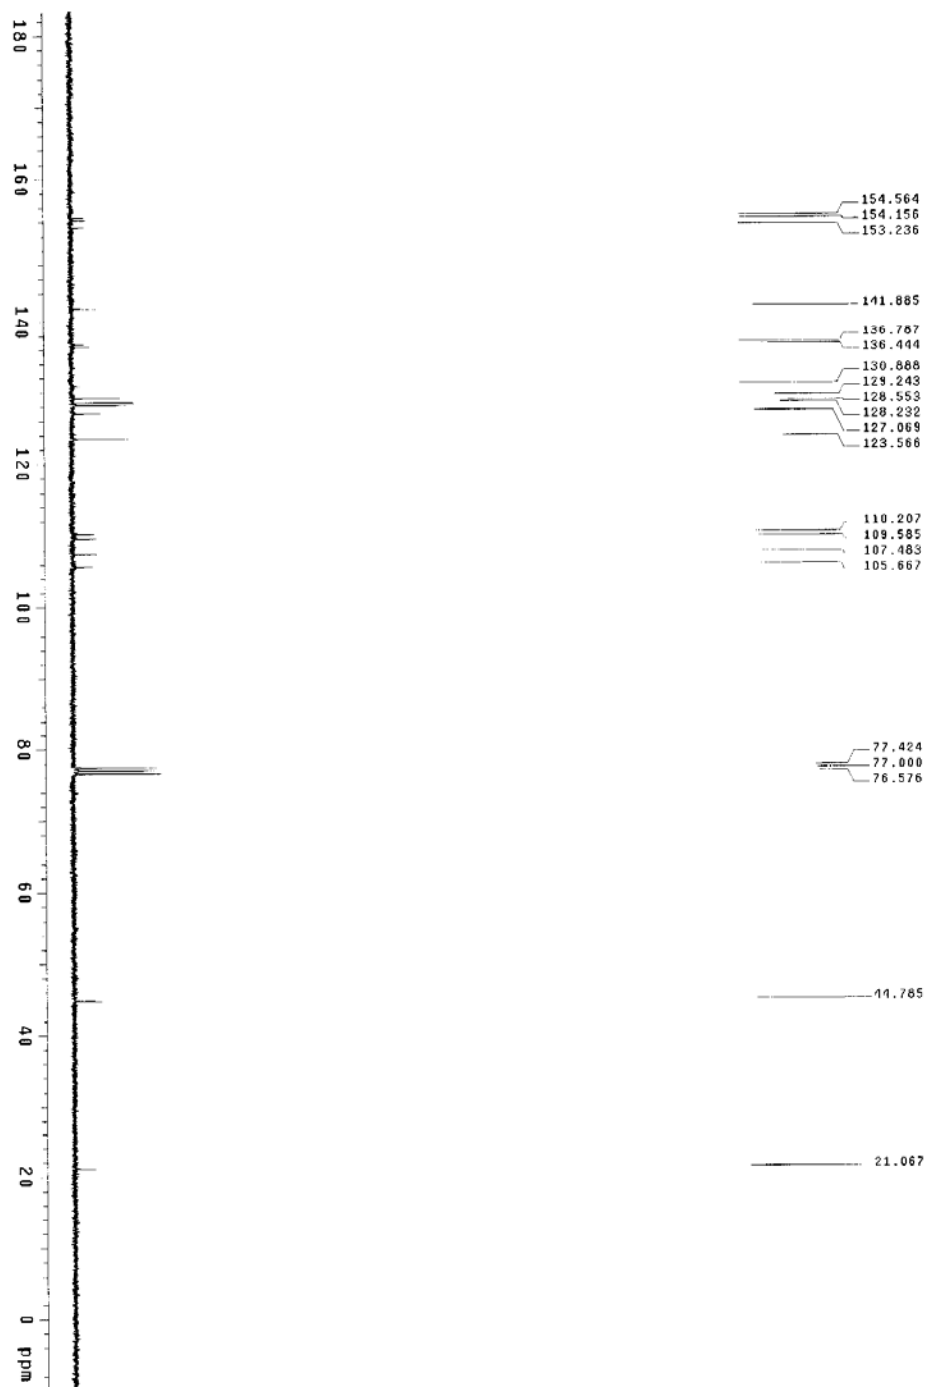

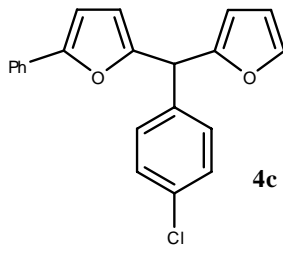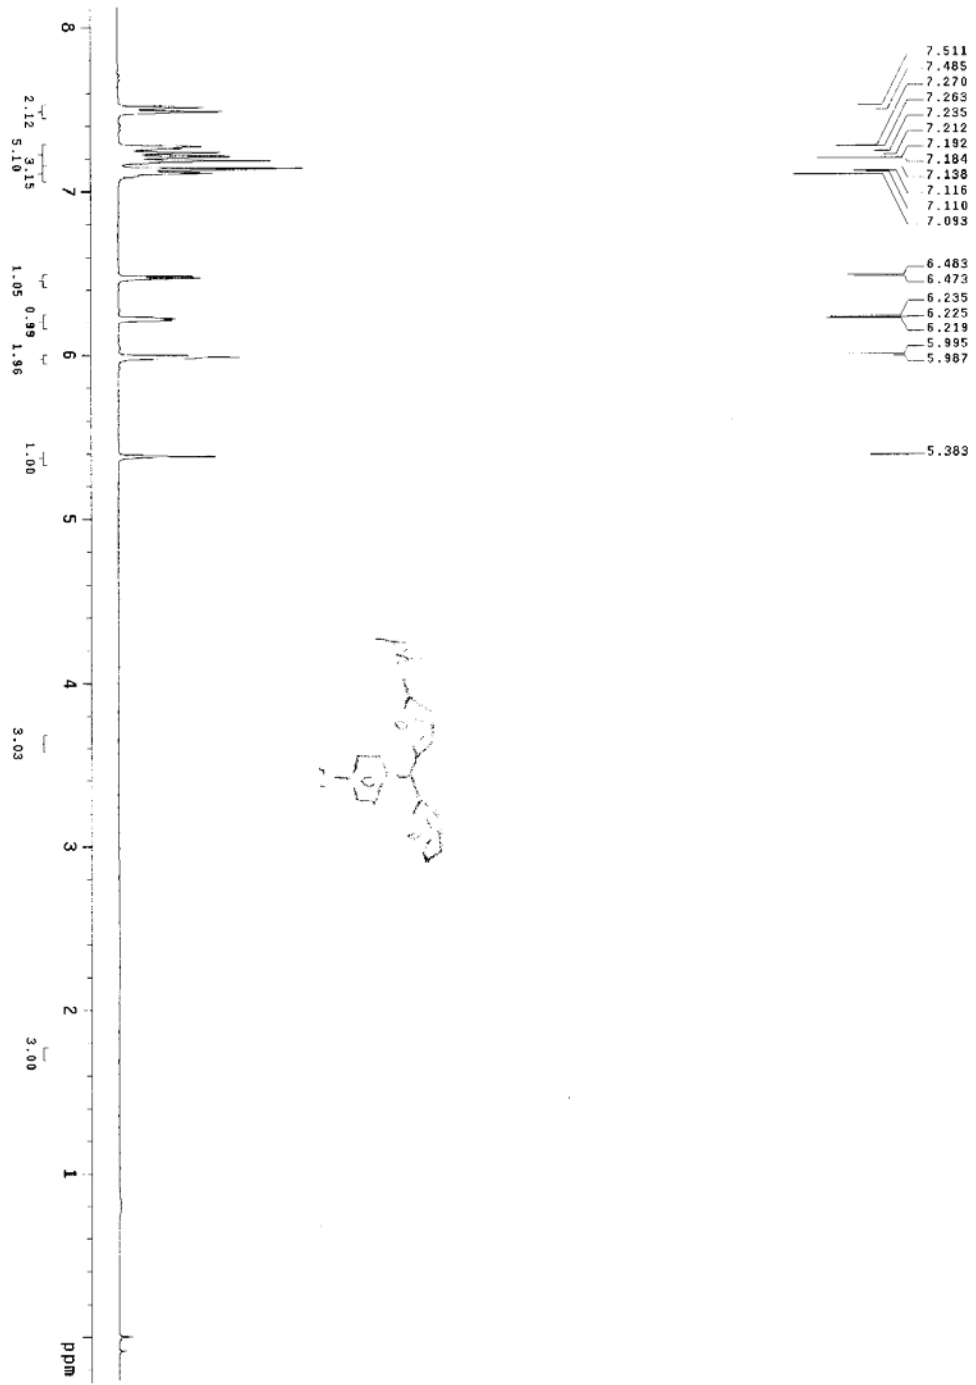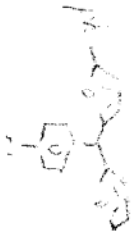

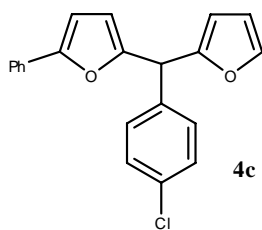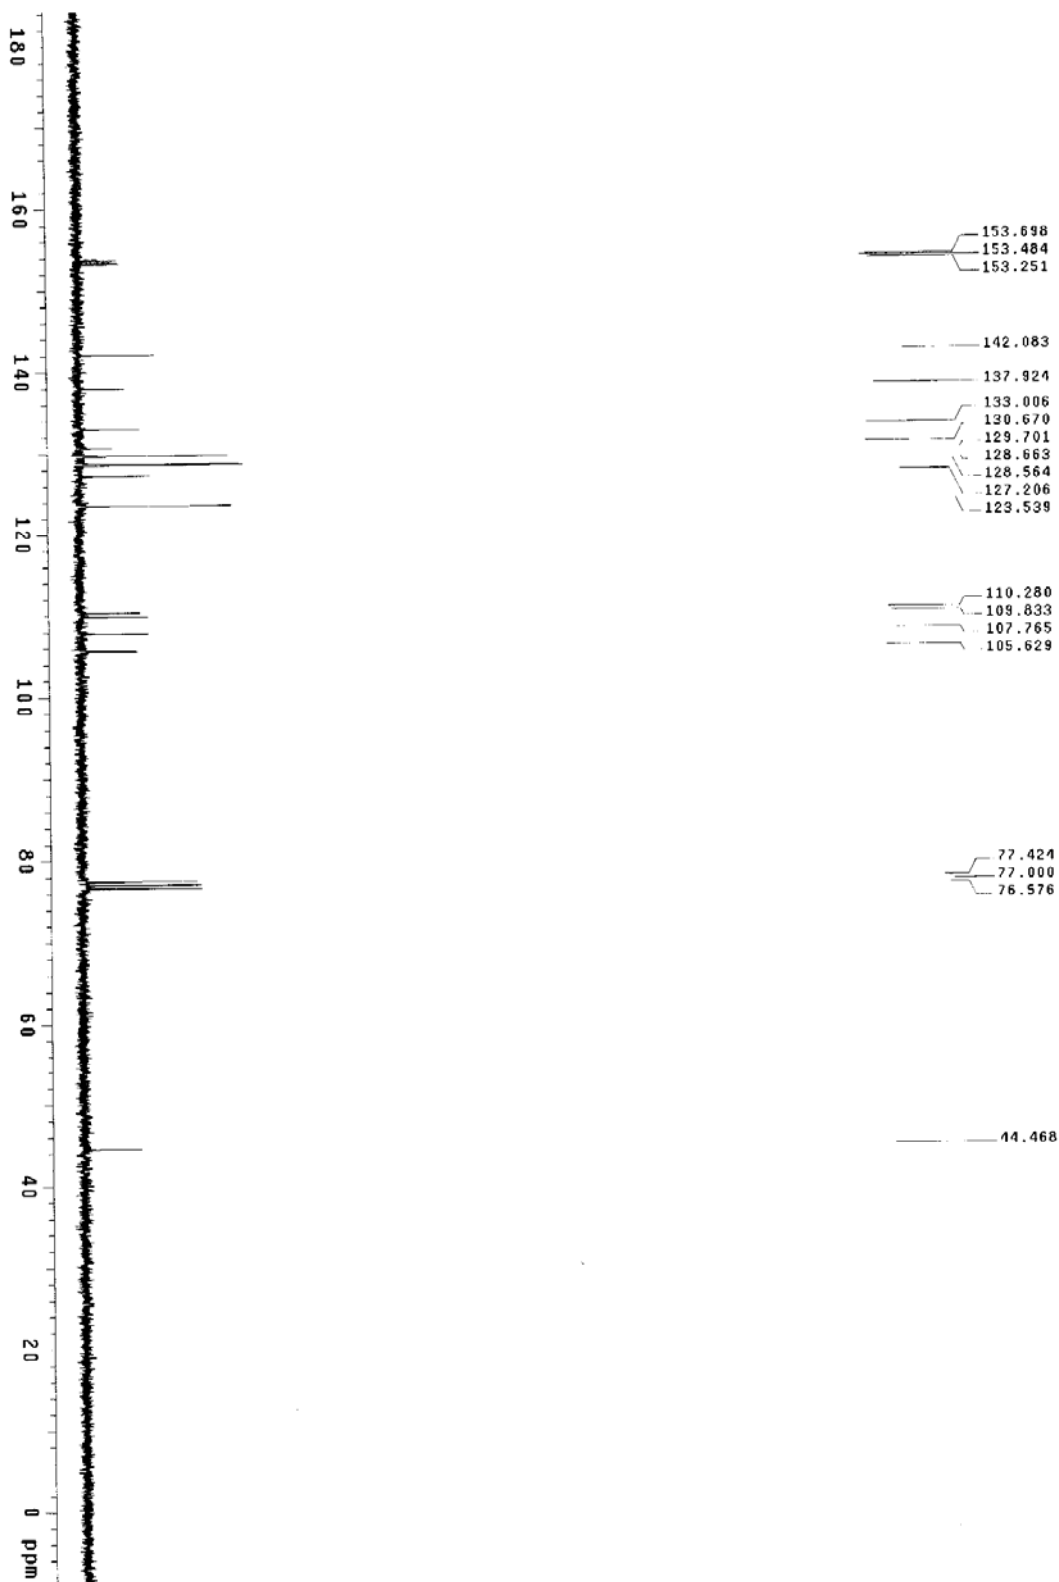

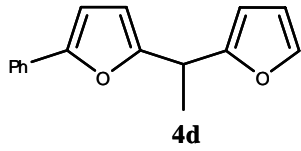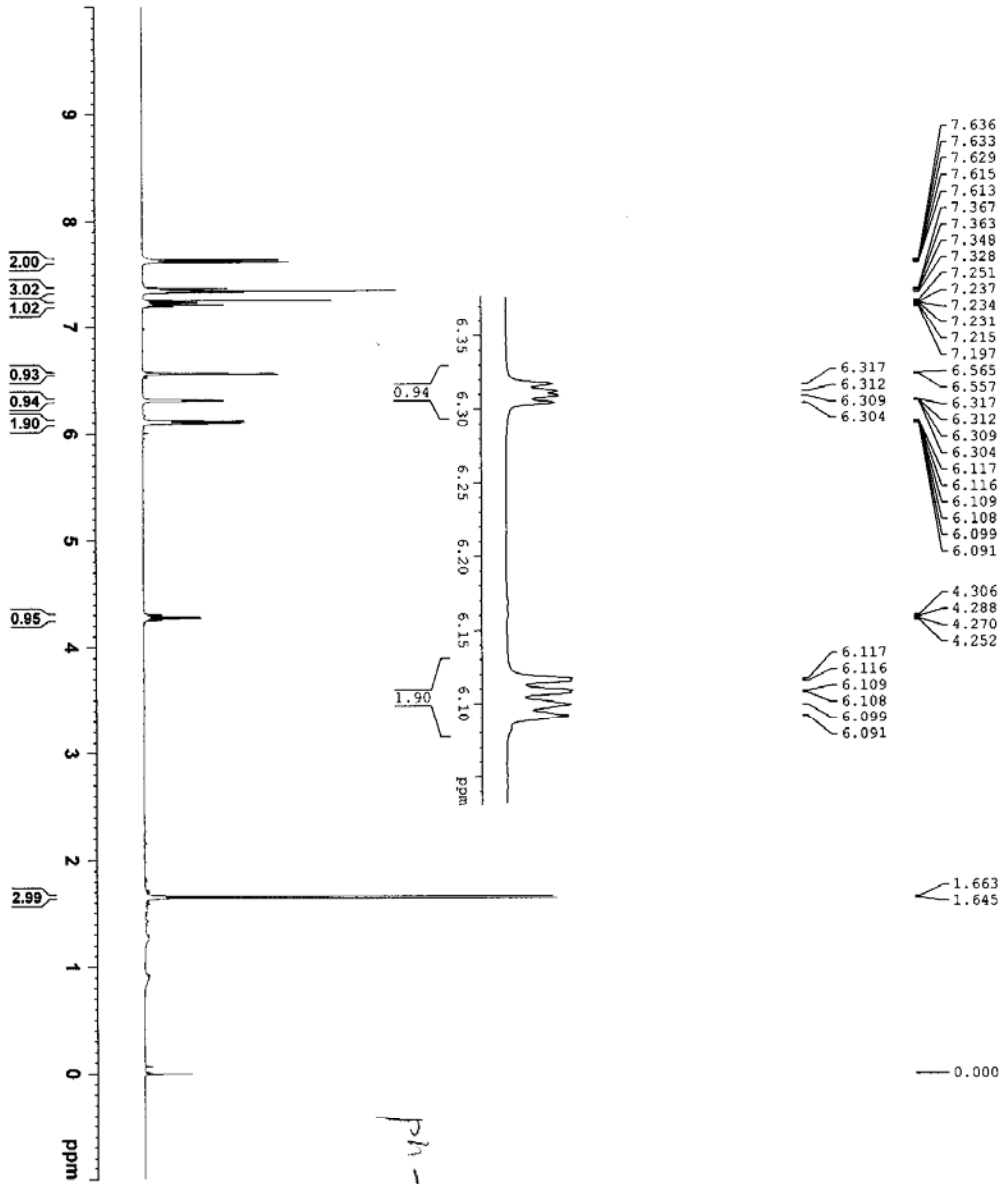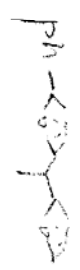

```

NAME          eJ10a
EXPNO         10
PROCNO        1
Date_         20080703
Time         2.26
INSTRUM      spect
PROBHD       5 mm PABBO
PULPROG      zgpg30
TD           65536
SOLVENT      CDCl3
NS           32
DS           2
SWH          8223.685 Hz
FIDRES       0.125483 Hz
AQ           3.9846387 sec
RG           327
WDW          EM
SSB          0
GB           0
PC           1.00

===== CHANNEL f1 =====
NUC1          1H
P1           14.60 usec
PL1          0 dB
RF1          400.1324710 MHz
SFO1         400.1300088 MHz
SF           400.1300088 MHz
WDW          EM
SSB          0
GB           0
PC           1.00
  
```

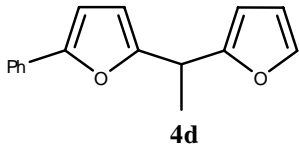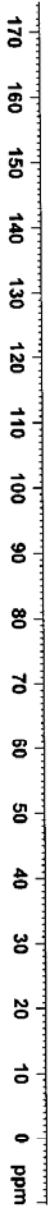

NAME: 4d  
 EXPNO: 11  
 PROCNO: 1  
 Date\_ : 20060703  
 Time: 2.37  
 INSTRUM: spect  
 PROBRD: 5 mm PABBO BB-  
 PULPROG: zgpg30  
 TD: 65536  
 F2: 100  
 SOLVENT: CDCl3  
 NS: 512  
 DS: 4  
 SWH: 24038.461 Hz  
 FIDRES: 0.367798 Hz  
 AQ: 1.361398 sec  
 RG: 320  
 RW: 20.800 usec  
 DC: 6.50 usec  
 TE: 297.4 K  
 D1: 2.0000000 sec  
 D11: 0.0300000 sec  
 TD0: 1

===== CHANNEL f1 =====  
 NUC1: 13C  
 P1: 9.40 usec  
 PL1: 0.00 dB  
 F1F4: 57.32143073 MHz  
 SFO1: 100.6228298 MHz

===== CHANNEL f2 =====  
 NUC2: 13C  
 P2: 9.40 usec  
 PL2: 0.00 dB  
 F2F4: 57.32143073 MHz  
 SFO2: 100.6228298 MHz

===== CHANNEL f3 =====  
 NUC3: 13C  
 P3: 9.40 usec  
 PL3: 0.00 dB  
 F3F4: 57.32143073 MHz  
 SFO3: 100.6228298 MHz

===== CHANNEL f4 =====  
 NUC4: 13C  
 P4: 9.40 usec  
 PL4: 0.00 dB  
 F4F4: 57.32143073 MHz  
 SFO4: 100.6228298 MHz

jikg10a-c

- 156.42
- 156.22
- 152.68
- 141.32
- 131.05
- 128.57
- 126.97
- 123.51
- 110.14
- 107.12
- 105.62
- 105.06
- 77.32
- 77.00
- 76.68
- 33.28
- 18.07

18.07 33.28 76.68 77.00 77.32 105.06 105.62 107.12 110.14 123.51 126.97 128.57 131.05 141.32 152.68 156.22 156.42



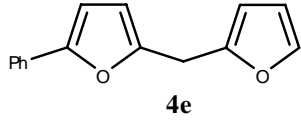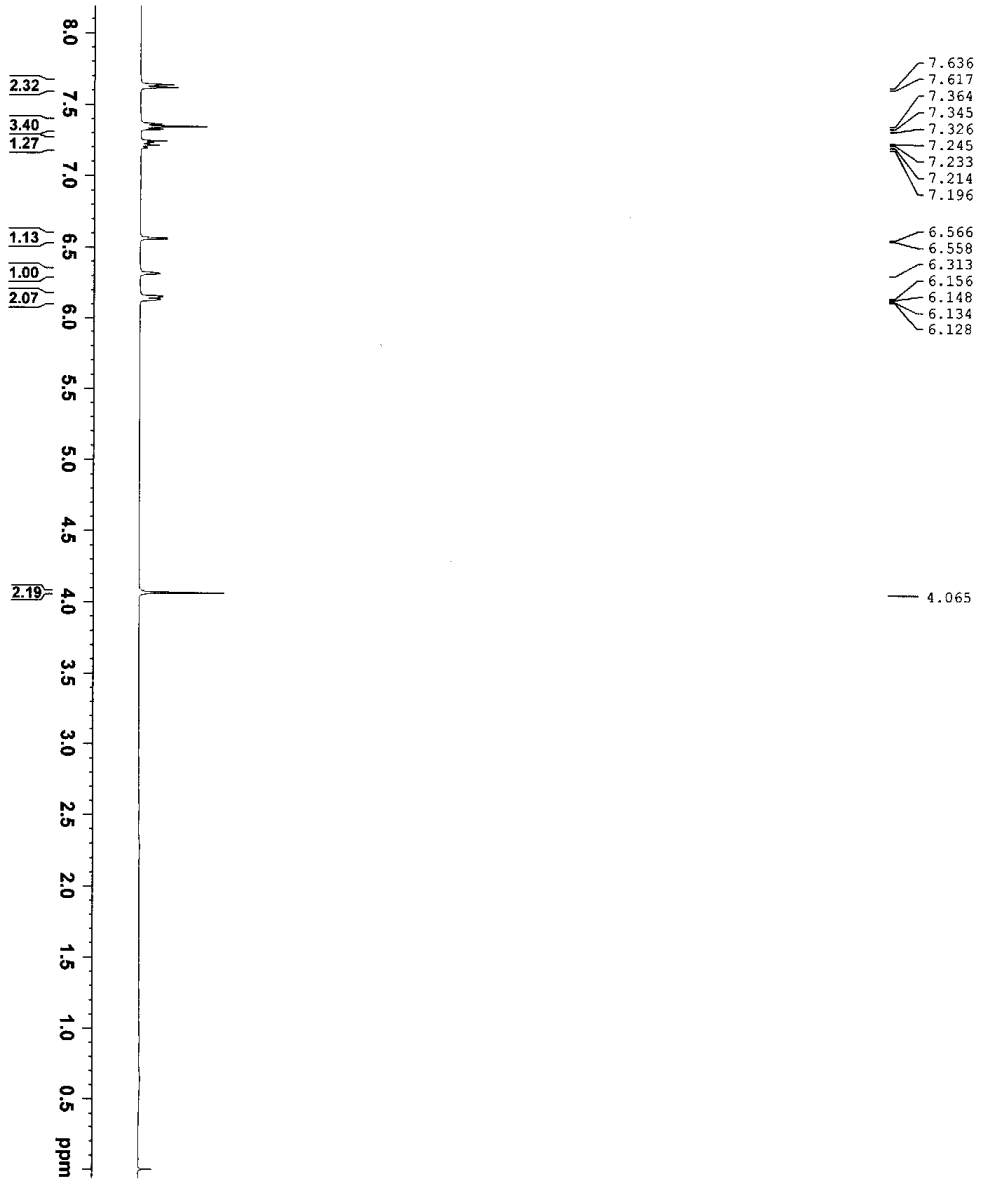

```

NAME          e-39a
EXPNO         10
PROCNO        1
Date_         20080702
Time         17.05
INSTRUM       5 mm PABBO BB-
PROBHD        spect
PULPROG       zgpg30
TD            65536
SOLVENT      CDCl3
NS           16
DS           1
SWH           6231.48 Hz
FIDRES       0.125483 Hz
AQ           3.9846387 sec
RG           45.2
RM           60.800 usec
UW           5.00 usec
TE           297.9 K
DE           1.00000000 sec
D1           1
TDO          1

===== CHANNEL f1 =====
NUC1          1H
P1           14.70 usec
PL           -1.00 dB
RG1          13.75398901 W
SFO1         400.132728 MHz
SI           32728
SF           400.1300110 MHz
WDW          EM
SSB          0
GB           0.30 Hz
PC           1.00
  
```

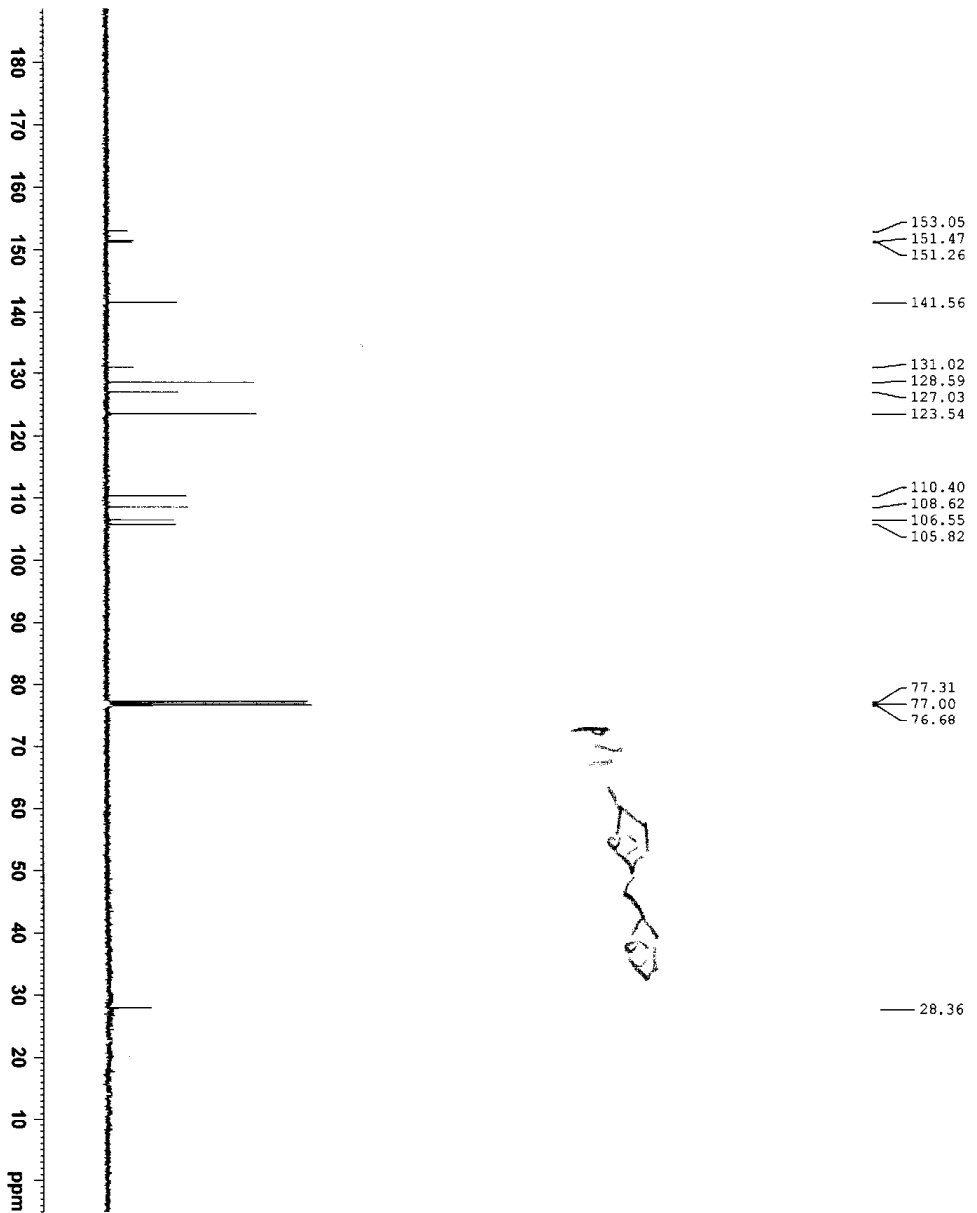

153.05  
151.47  
151.26  
141.56  
131.02  
128.59  
127.03  
123.54  
110.40  
108.62  
106.55  
105.82  
77.31  
77.00  
76.68

28.36

NAME e13a  
EXPNO 11  
PROCNO 1  
F2 - 20090701  
Time 17.15  
INSTRUM spect  
PROBHD 5 mm PABBO B9-  
PULPROG zgpg30  
SOLVENT CDCl3  
NS 388  
DS 4  
SWH 24039.461 Hz  
AQ 0.0551177 sec  
RG 1.361988 sec  
AD 71.8  
DW 20.800 usec  
DE 6.50 usec  
TE 300.2 K  
D11 2.0000000 sec  
D1 0.0300000 sec  
TD0 1

===== CHANNEL f1 =====  
NUC1 13C  
P1 9.70 usec  
PL1 -2.00 dB  
PL1W 56.13911005 W  
SFO1 100.62829298 MHz

===== CHANNEL f2 =====  
CPDPRG2 waltz16  
NUC2 1H  
RCHD2 80.00 usec  
FL2 1.50 dB  
PL2 13.90 dB  
PL13 13.90 dB  
PL12W 17.72104263 W  
PL12W 0.44513249 W  
PL12W 0.44513249 W  
ST 400.132768 MHz  
SF 100.6127649 MHz  
WEM EM  
SSB 0  
GB 0  
PC 1.40

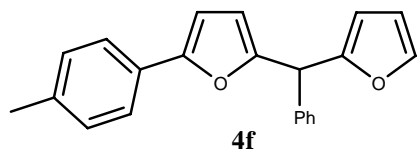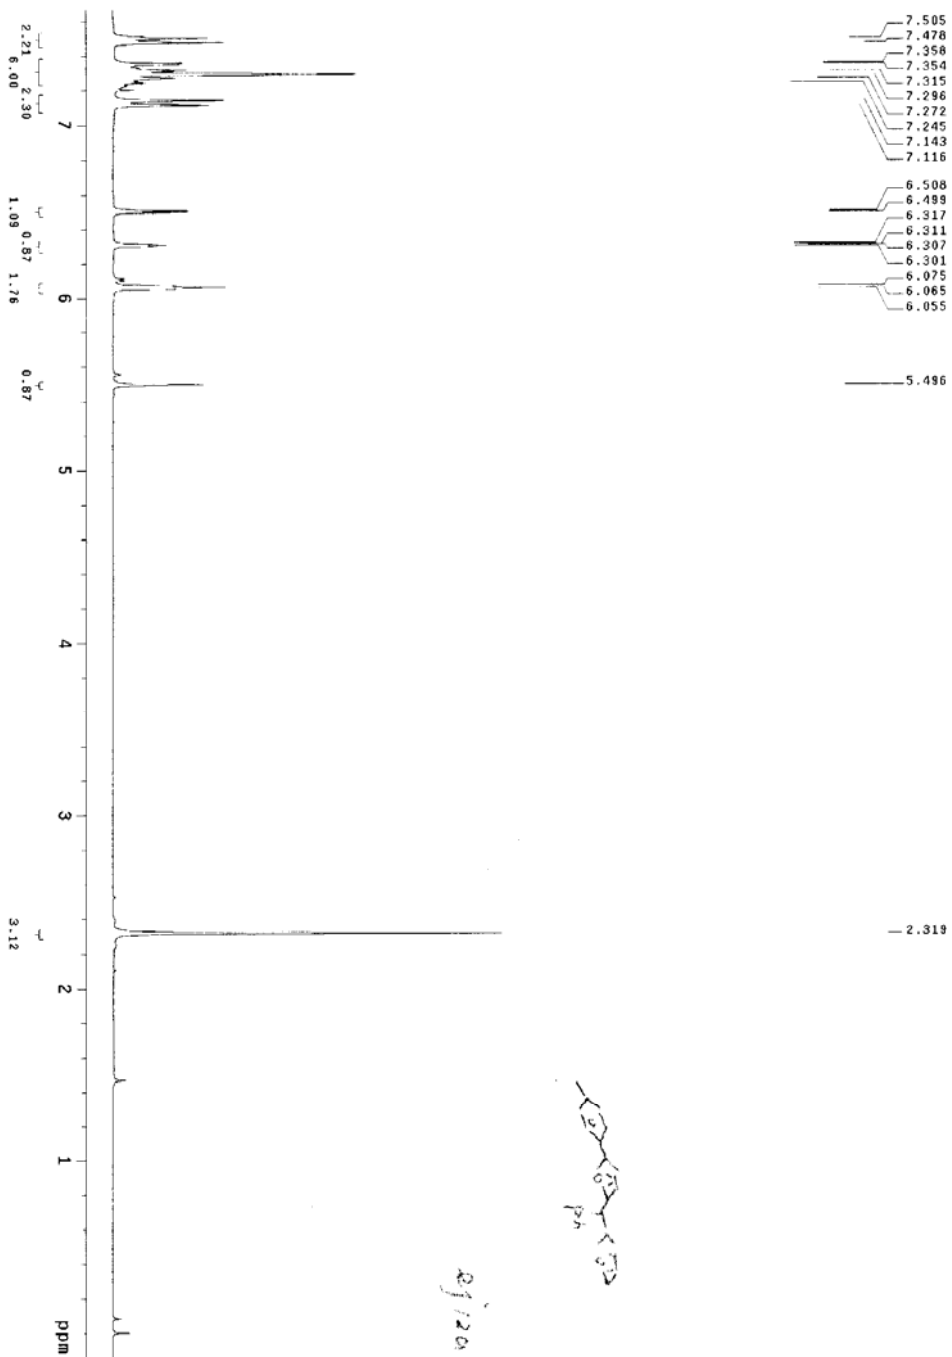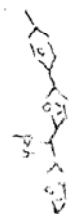

20120-14

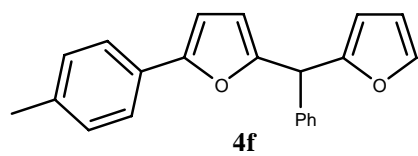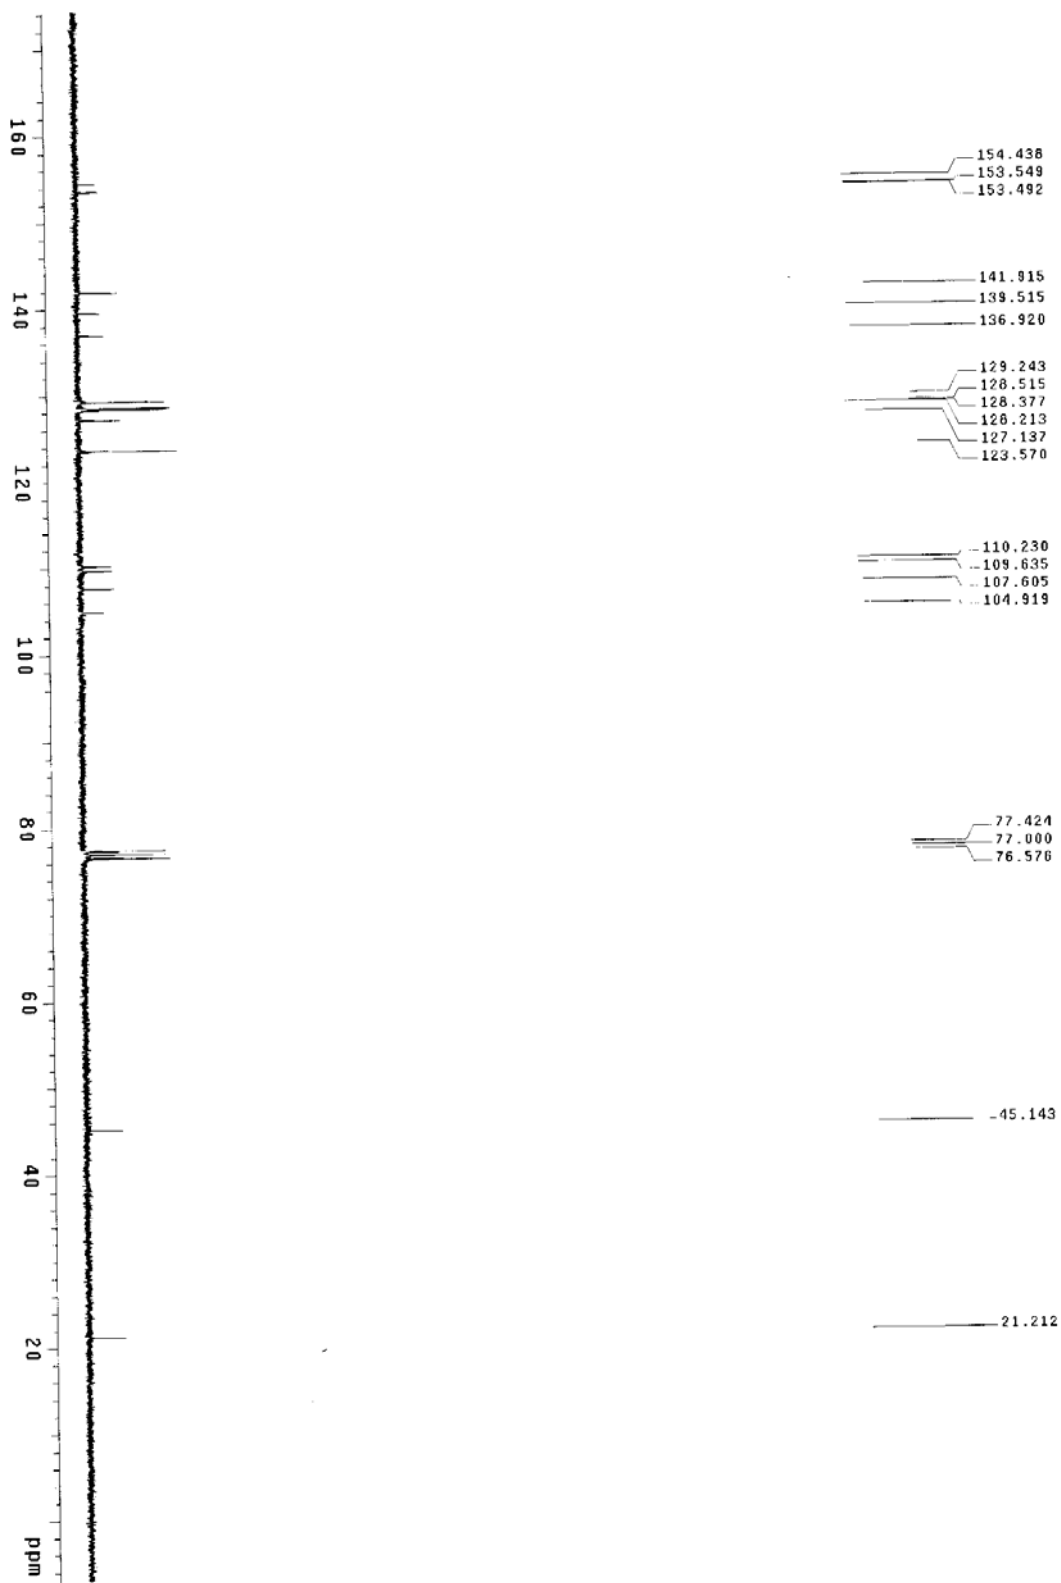

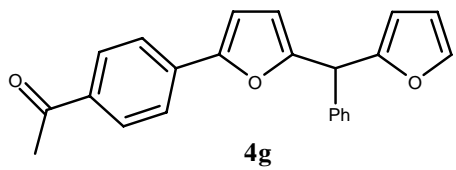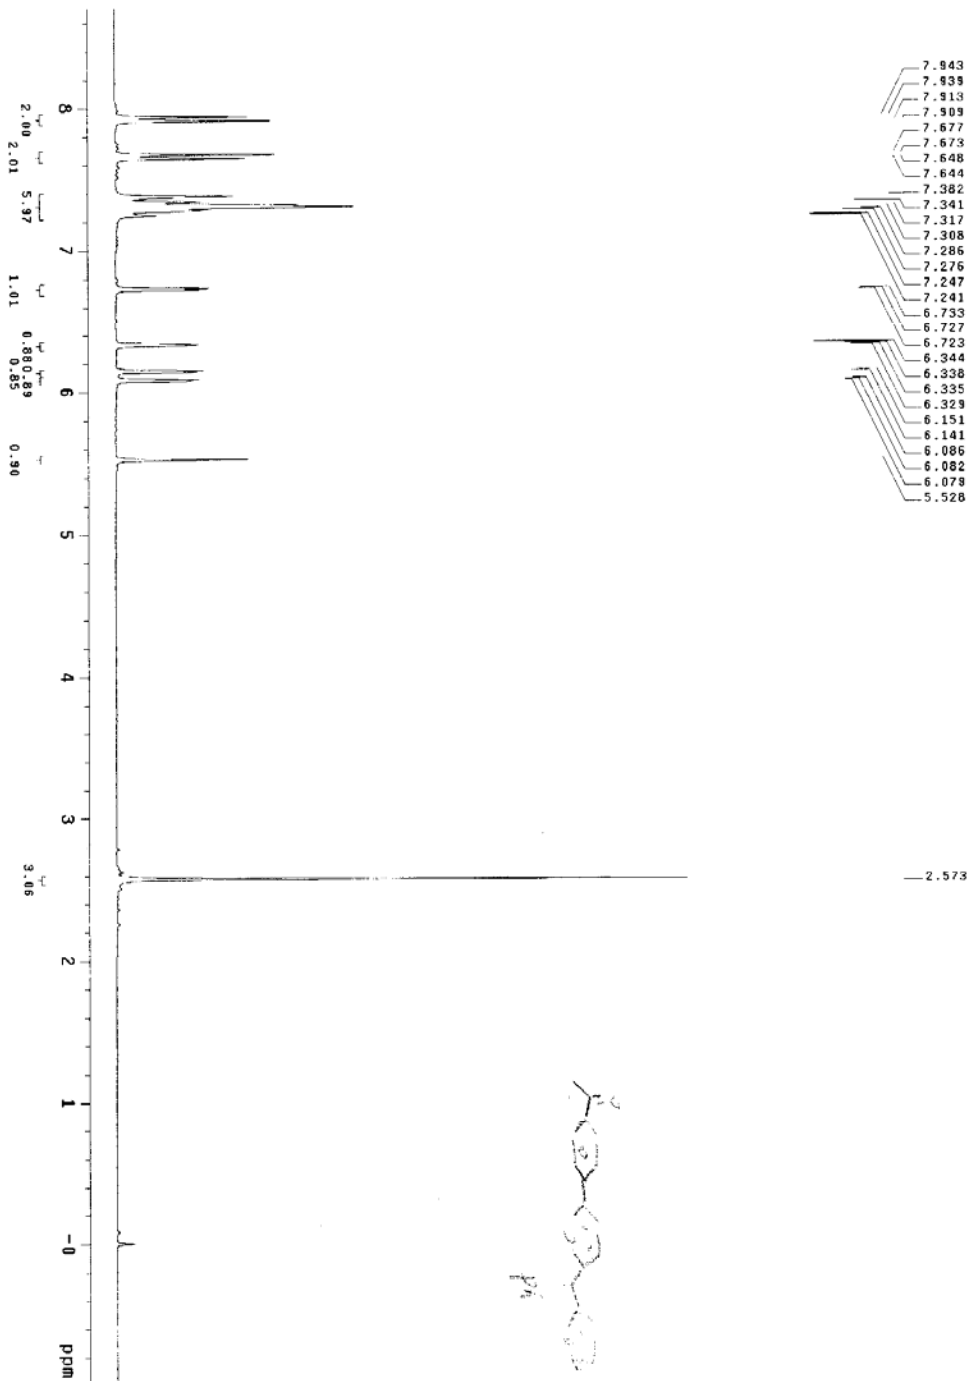

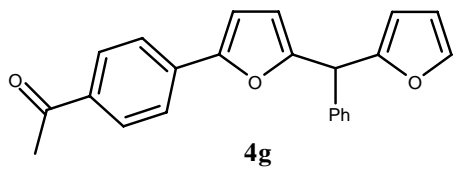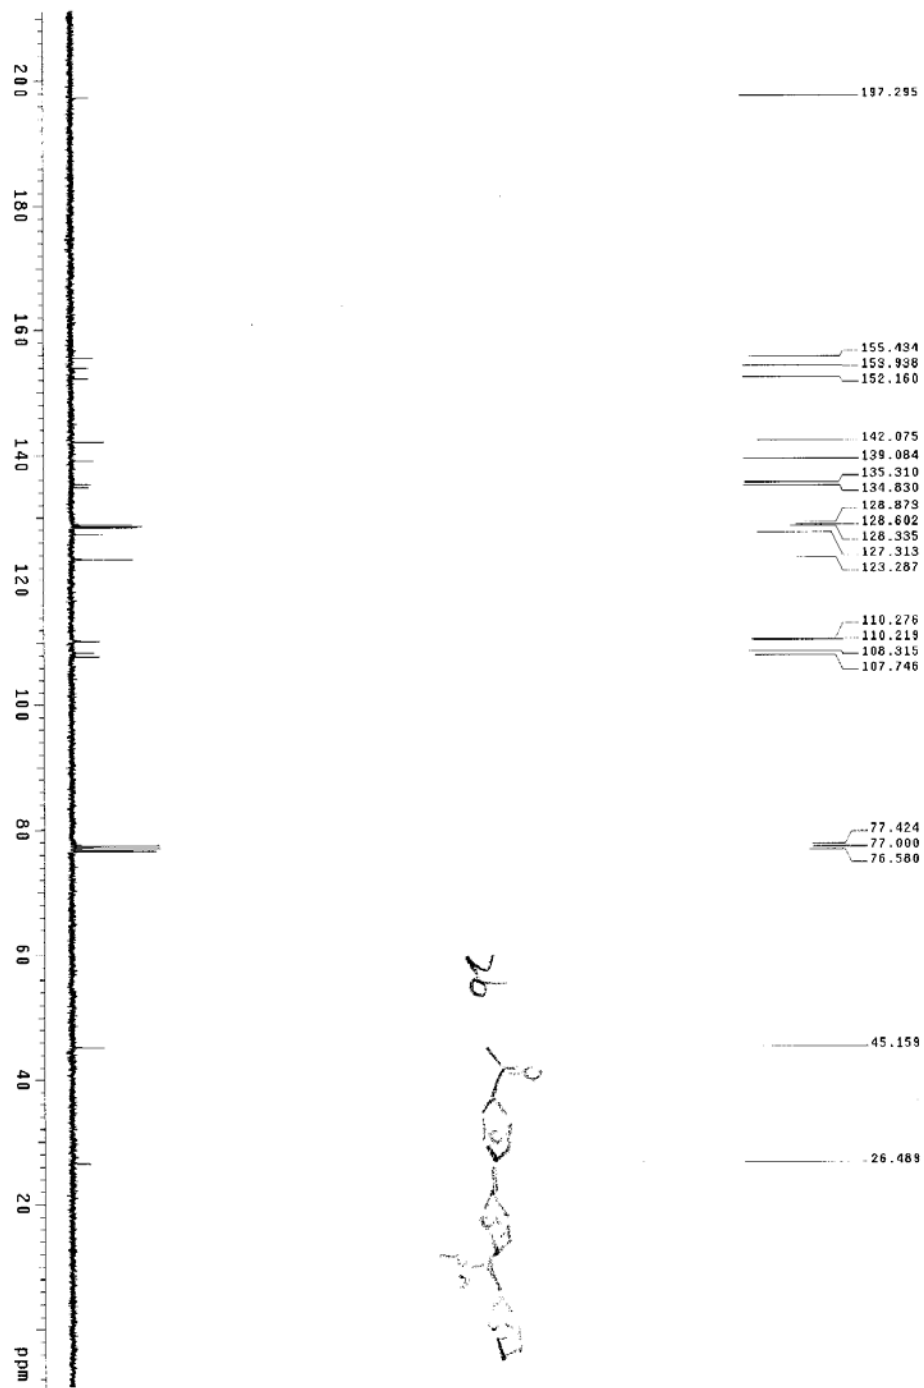

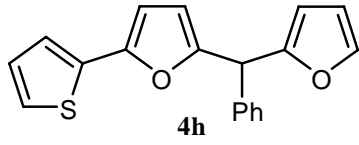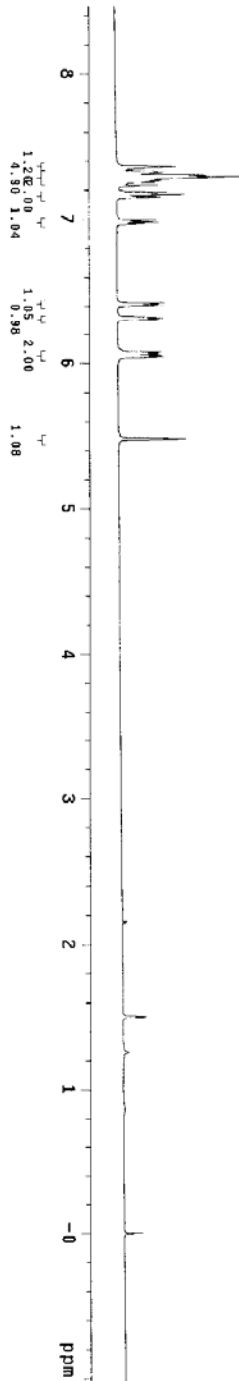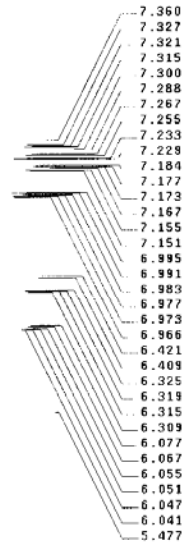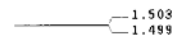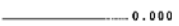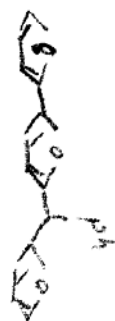

of 70

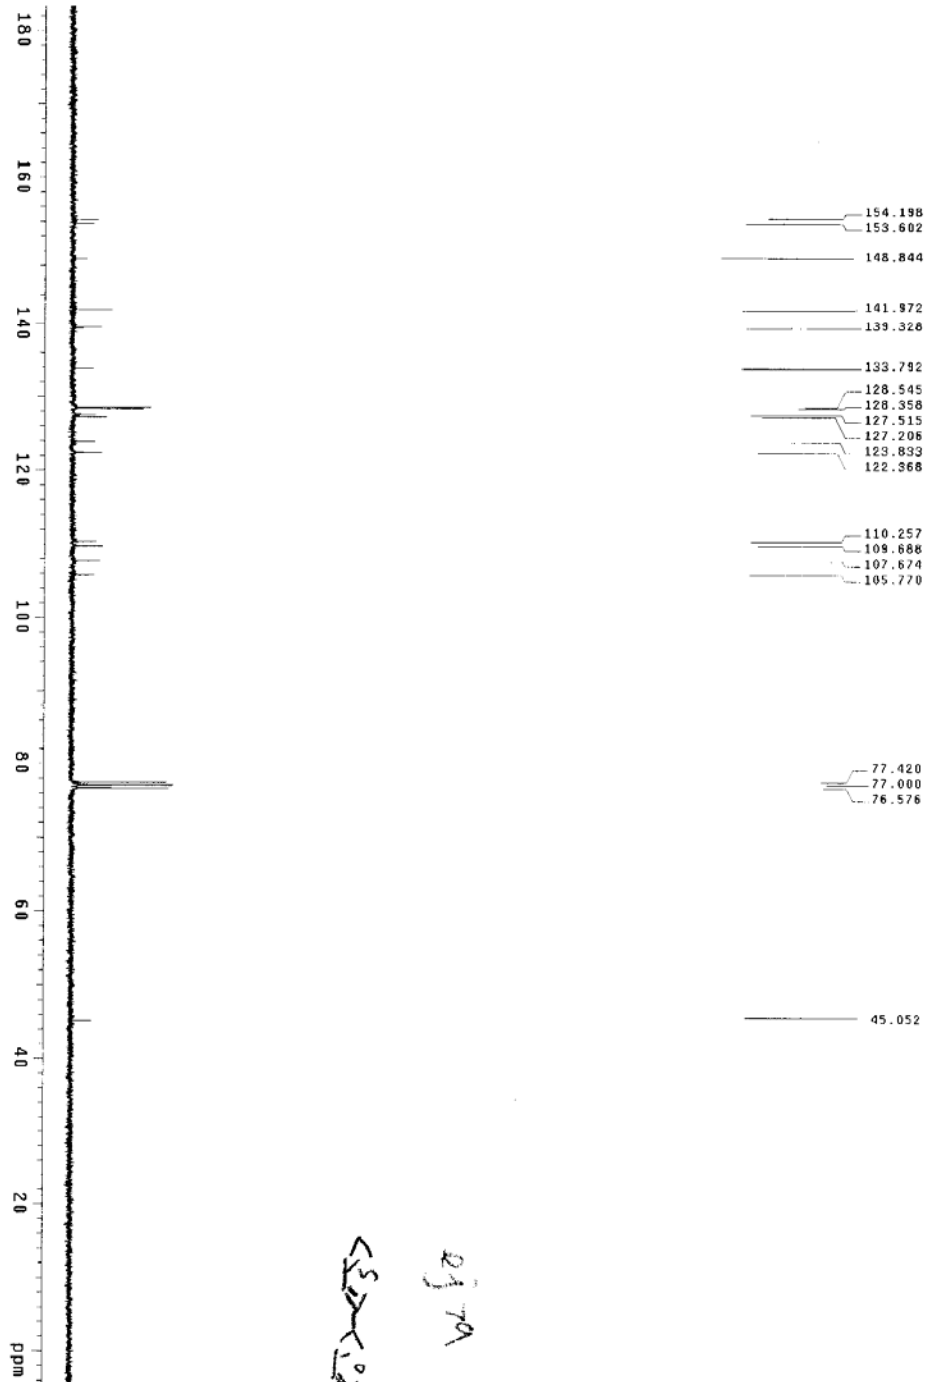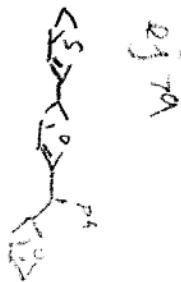



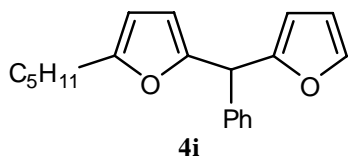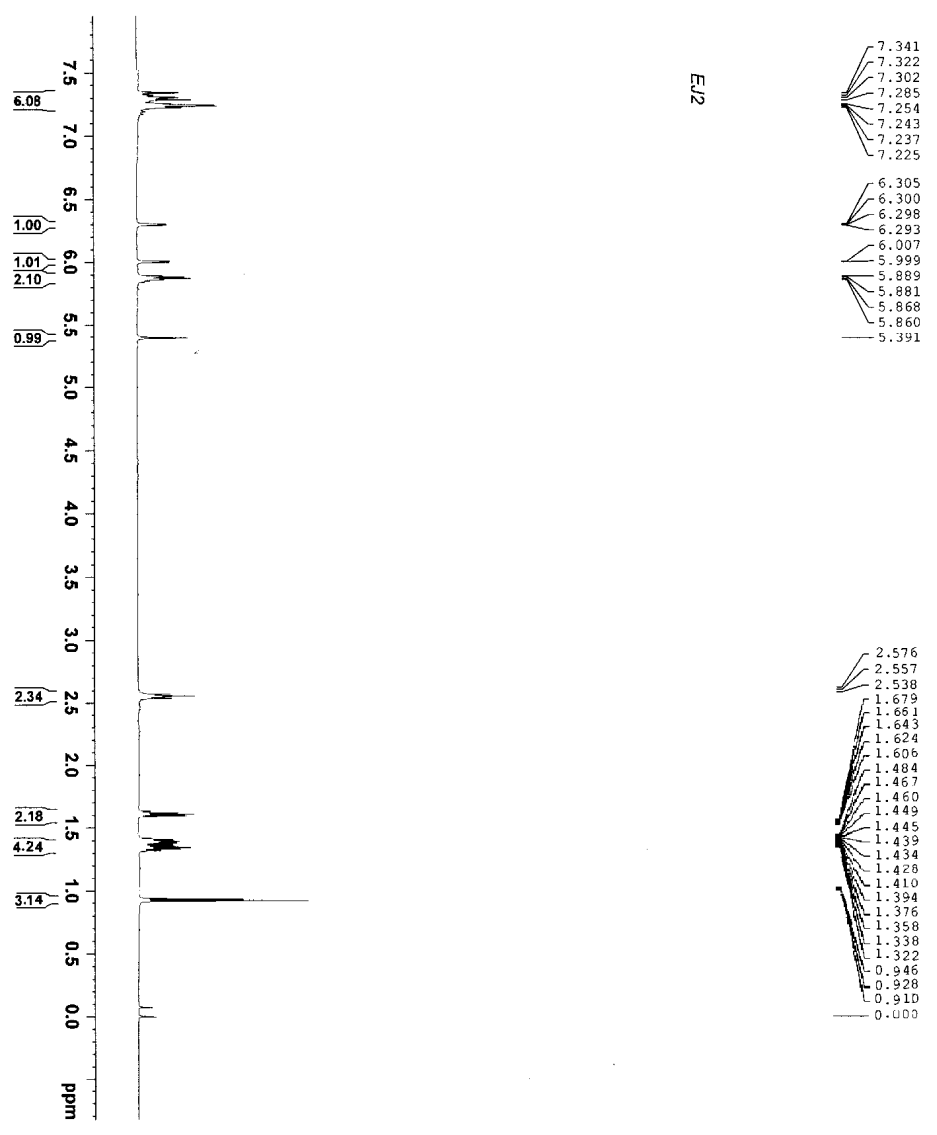

EJ2

```

NAME                               4i2
EXPNO                               1
PROCNO                              1
DATE_                                20090619
TIME                                11.22
INSTRUM                              PROBHD
PROBHD                               5 mm PABBO BB-
PULPROG                               zgpg30
PCPDPRG                               cpc13
SOLVENT                               CDCl3
NS                                    16
DS                                    2
SSB                                    0
AQ                                     3223.68 Hz
ETDRES                               0.120483 Hz
RG                                     671.8
RG2                                    1.0
DE                                     6.50 usec
TE                                     296.3 K
D1                                     1.00000000 sec
D10                                    1
===== CHANNEL f1 =====
NUC1                                  1H
P1                                     14.00 usec
PL1                                    0.00 dB
PL12                                   11.47932053 W
SFO1                                  400.1329110 MHz
SI                                     32
SF                                      400.1302118 MHz
WDW                                    EM
SSB                                    0
LB                                     0
GB                                     0
PC                                     1.00
  
```

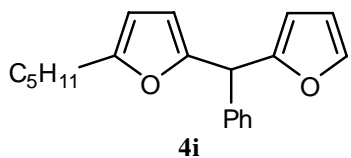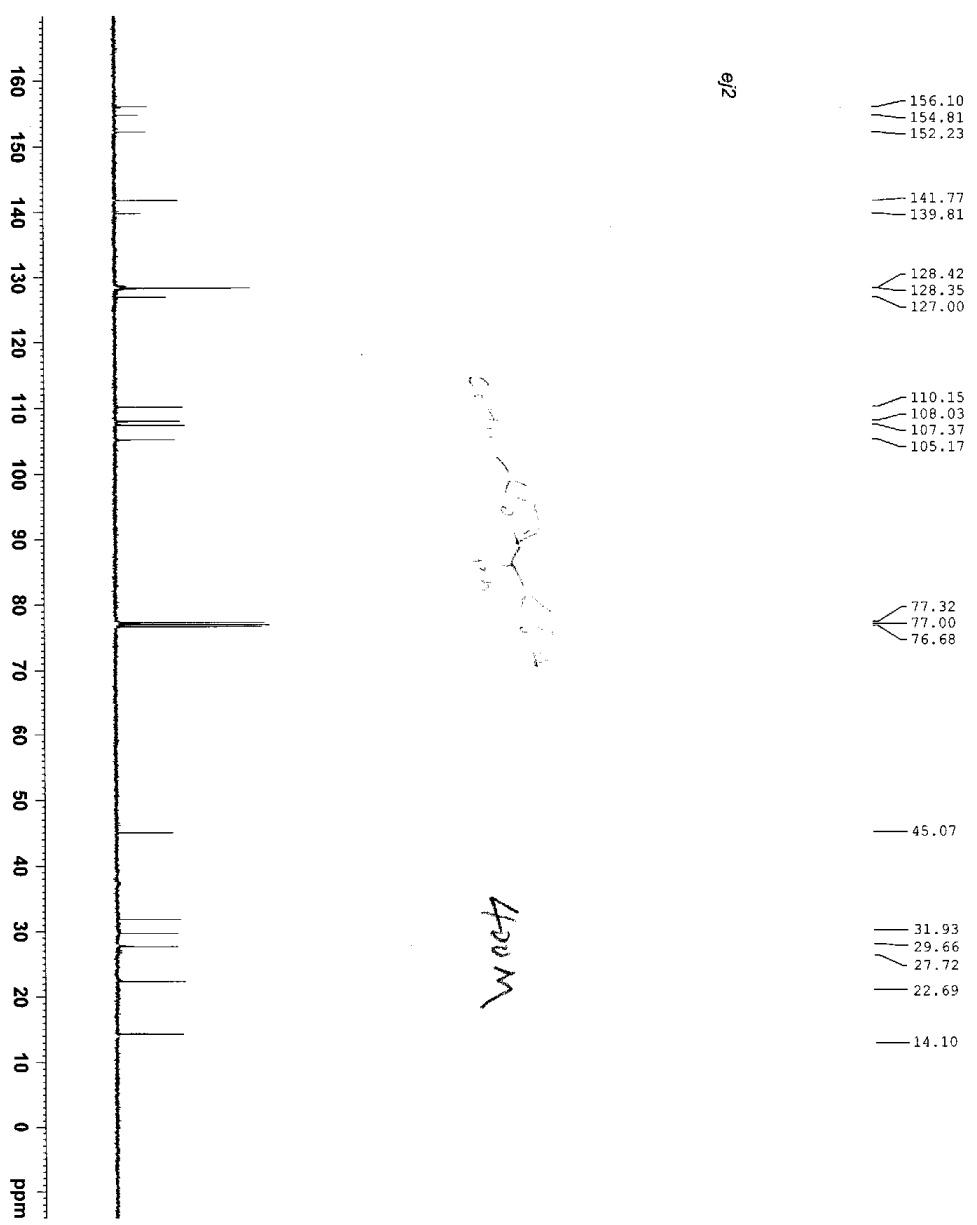

| Chemical Shift (ppm) |
|----------------------|
| 156.10               |
| 154.81               |
| 152.23               |
| 141.77               |
| 139.81               |
| 128.42               |
| 128.35               |
| 127.00               |
| 110.15               |
| 108.03               |
| 107.37               |
| 105.17               |
| 77.32                |
| 77.00                |
| 76.68                |
| 45.07                |
| 31.93                |
| 29.66                |
| 27.72                |
| 22.69                |
| 14.10                |

```

NAME          e12
EXPNO        11
PROCNO       20080618
Time         16:02
INSTRUM      5 mm PASPO HR-
PROBHD       QNP1H
PULPROG      zgpg30
TD           65536
SOLVENT      CDCl3
NS           150
DS           4
SFO          243.8444 Hz
AQ          0.366798 Hz
RG           1.361988 sec
NO          2050
SI           25.800 usec
SF           201.25 usec
DE           2.13 usec
TE           2.00000000 sec
D:1          0.03000000 sec
TDC          1

===== CHANNEL f1 =====
NUC1         13C
P1           9.40 usec
PL1         -2.00 dB
RF1M        57.32743973 MHz
SFO1        100.628358 MHz

===== CHANNEL f2 =====
NAME         wait216
NUC2         1H
P2           90.18 usec
PL2         -2.00 dB
RF2M        400.1316005 MHz
SFO2        400.1316005 MHz
SI           32768
SF           100.6127700 MHz
DS           4
SFO         201.25 usec
TE           2.00 usec
D:1         0.03000000 sec
PC           1.40
  
```

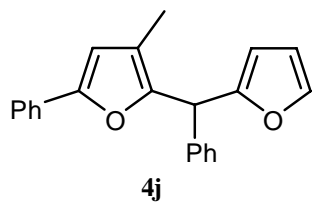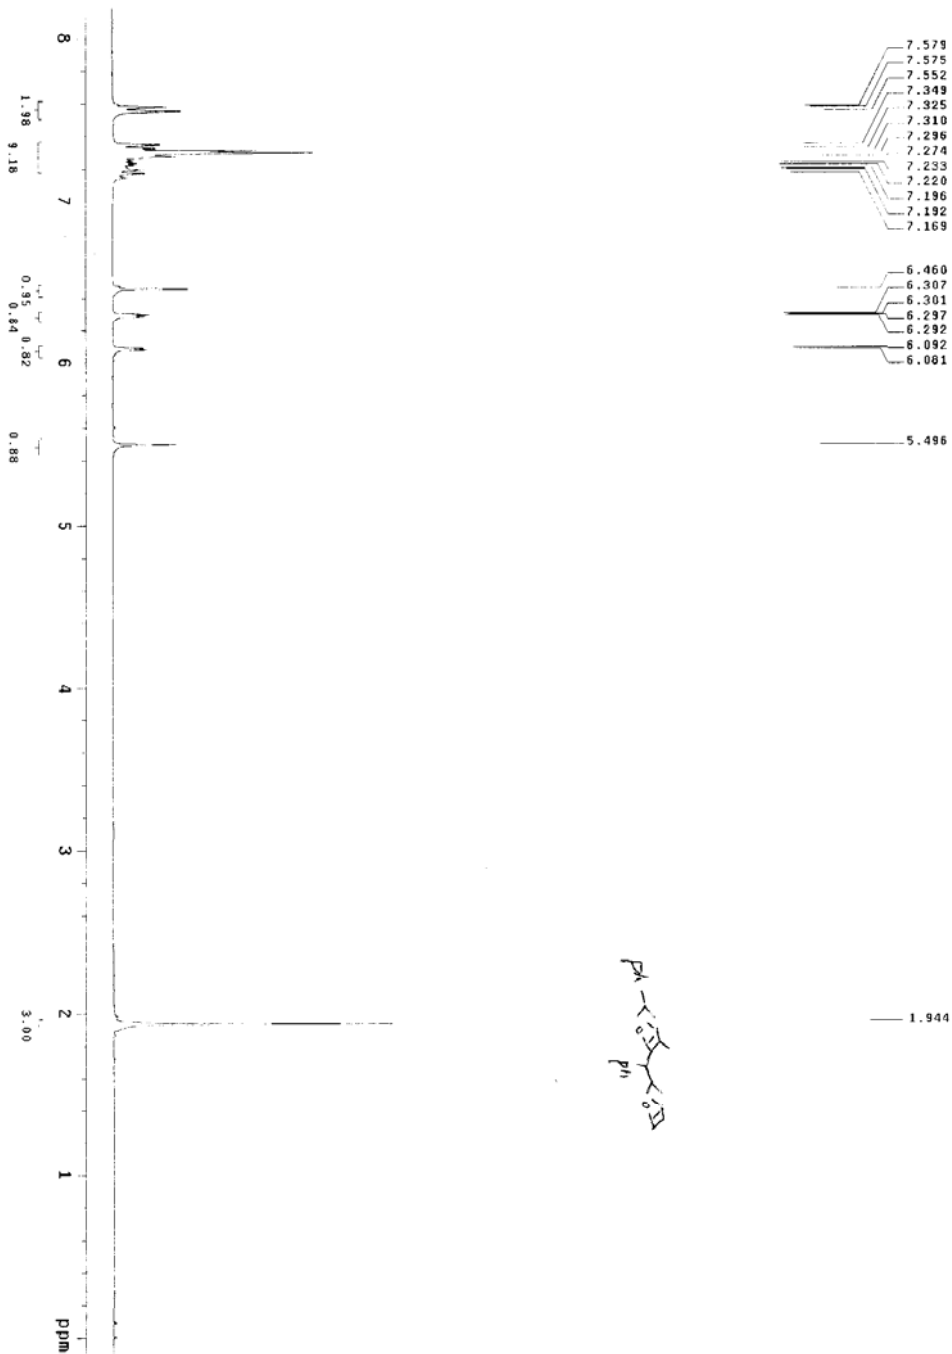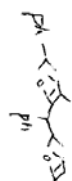

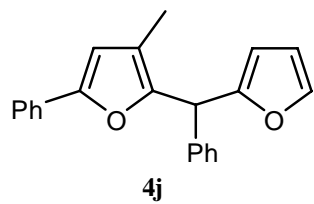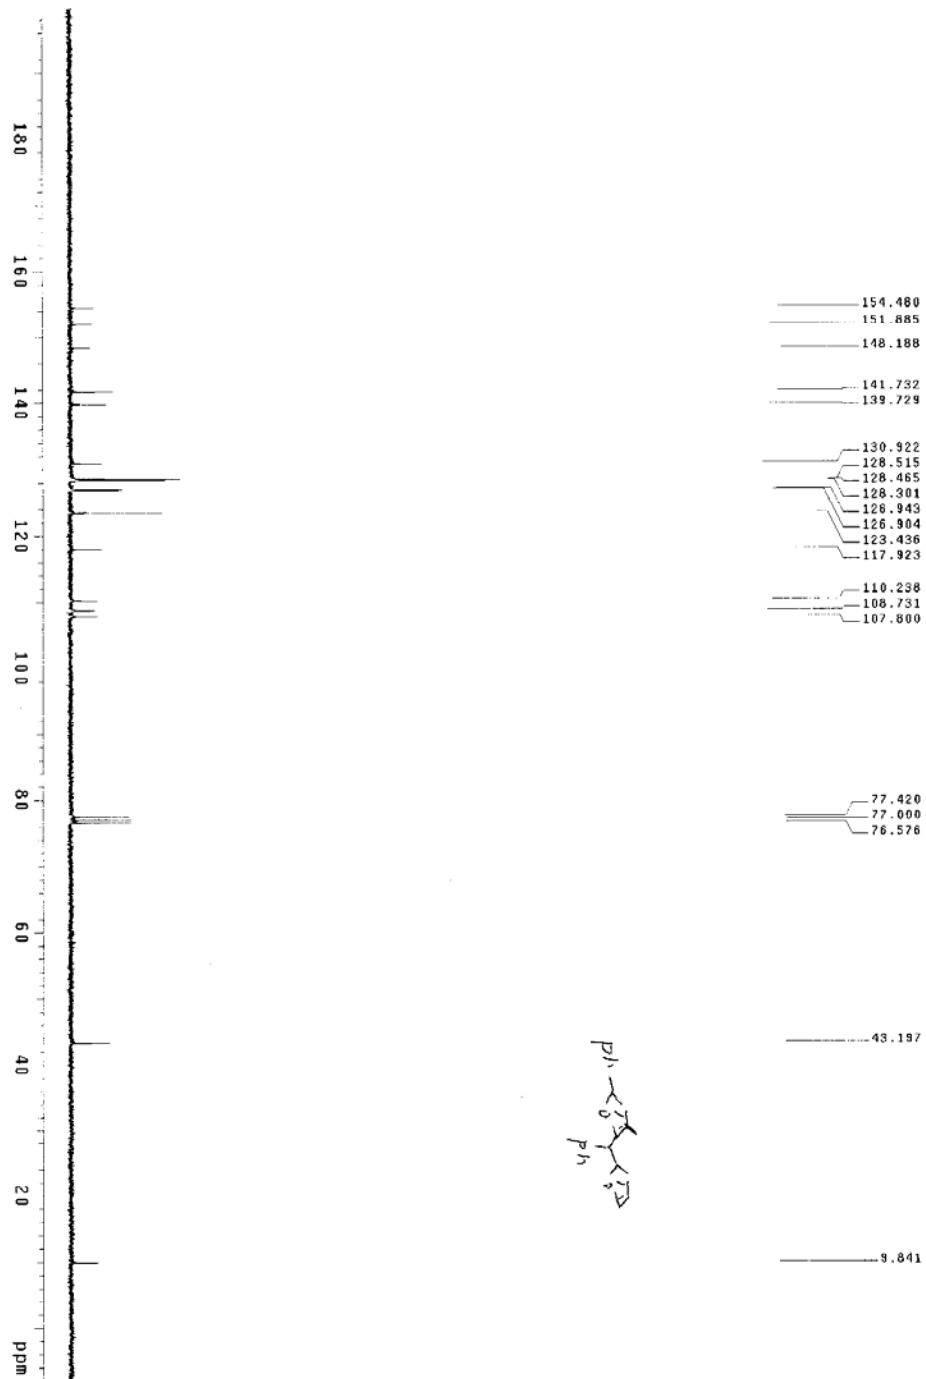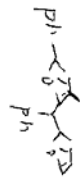

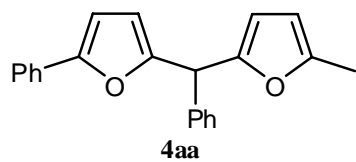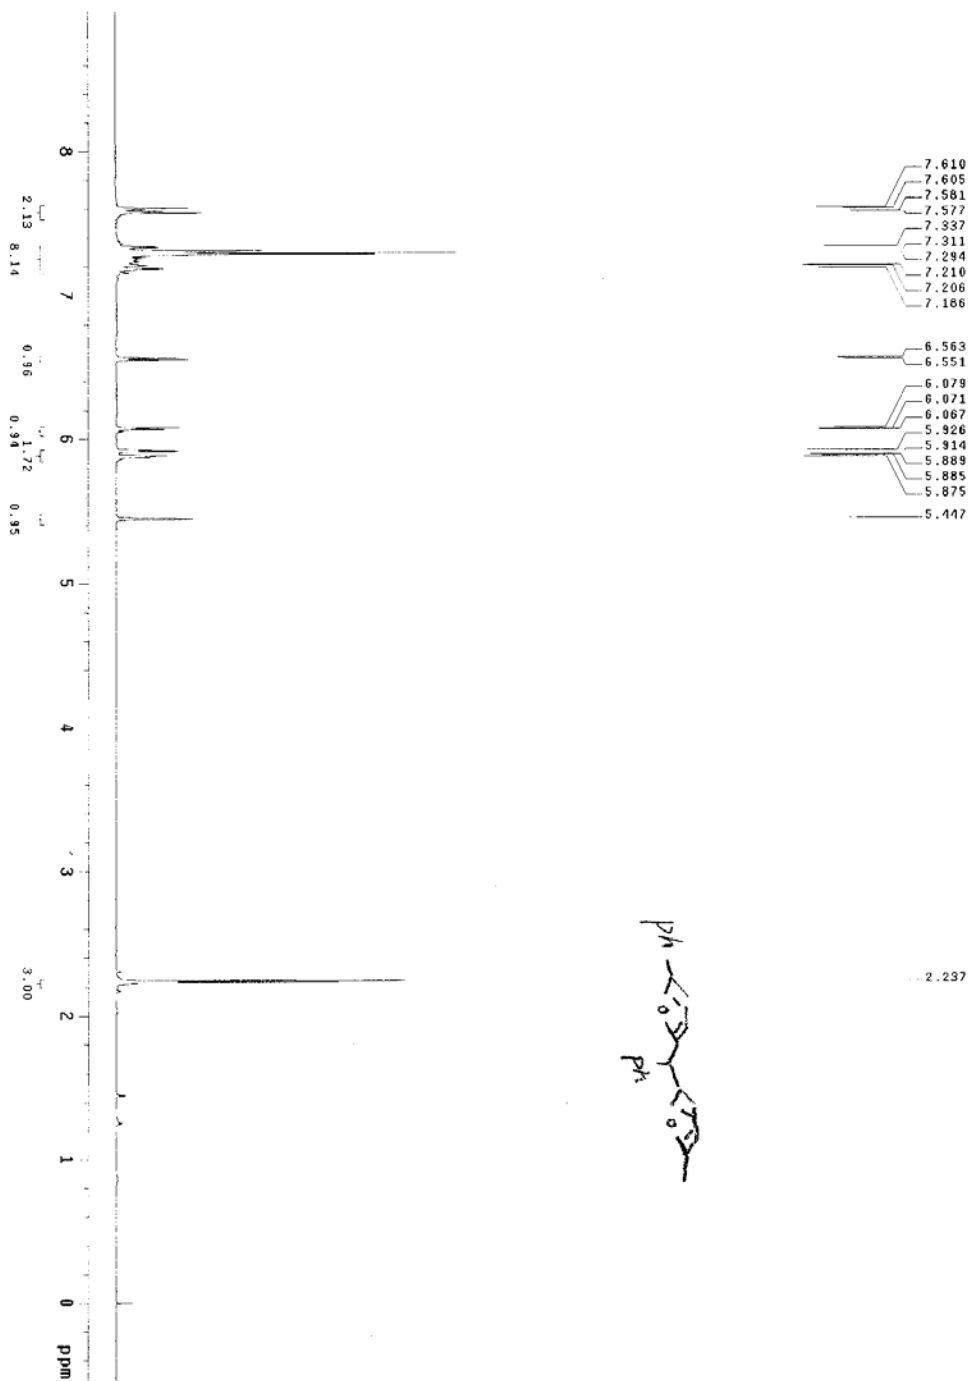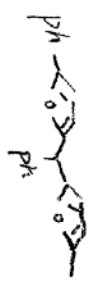

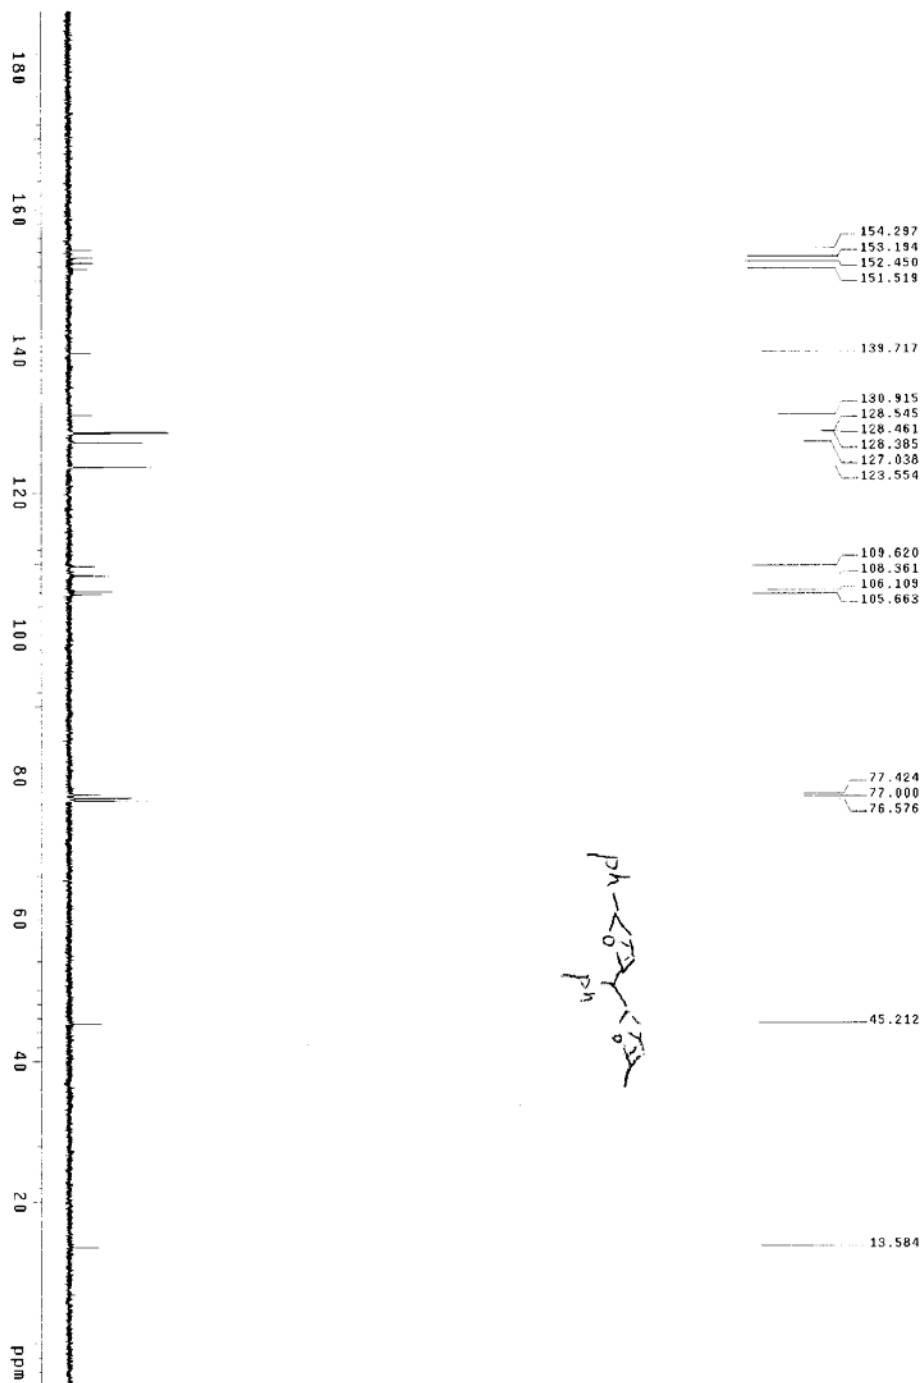

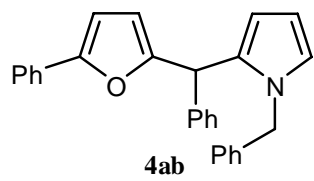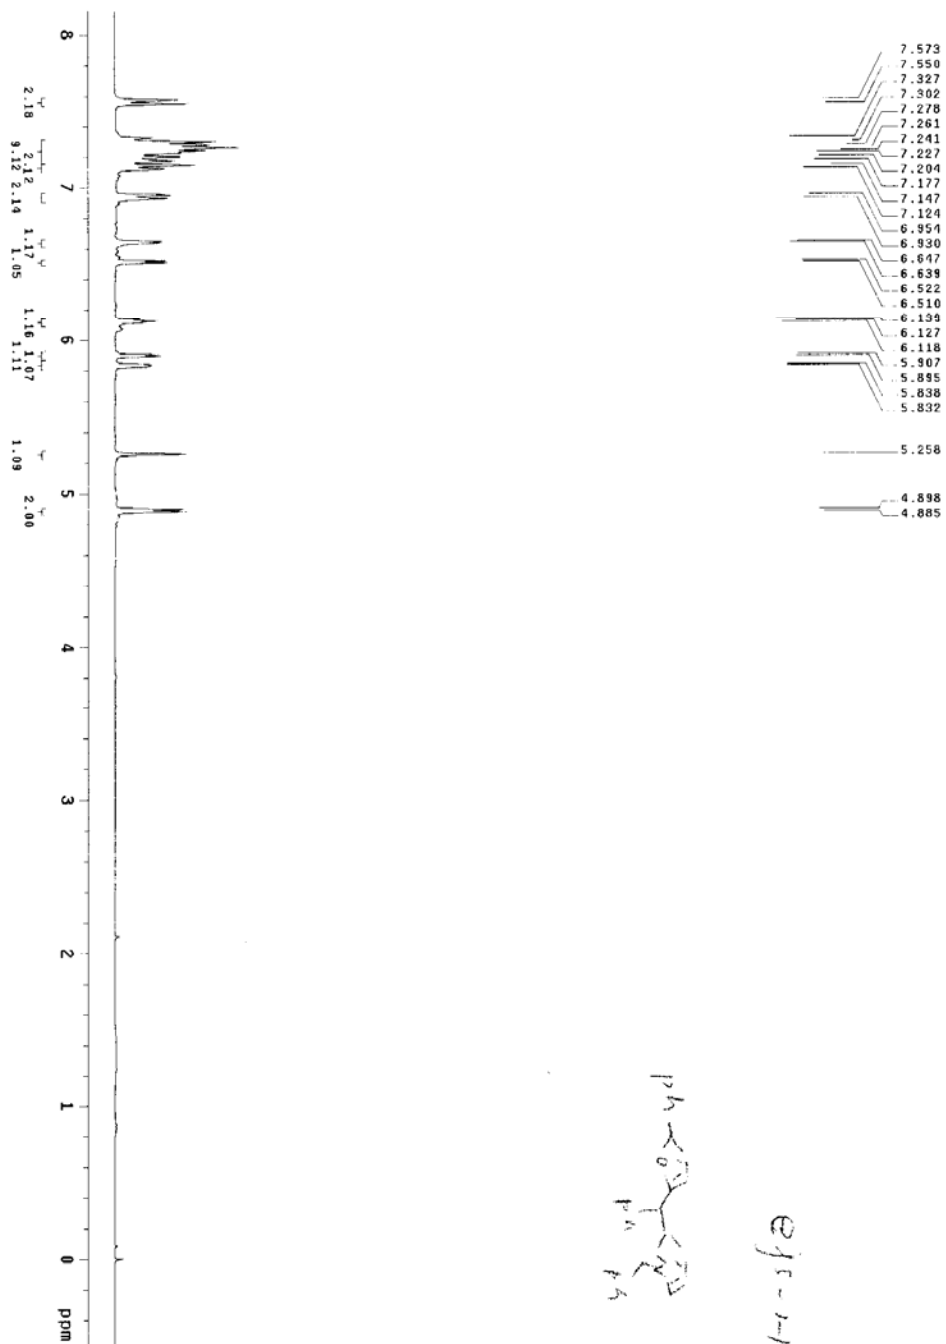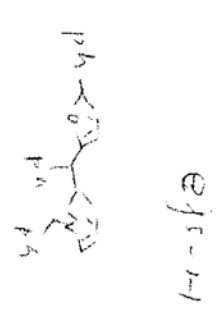

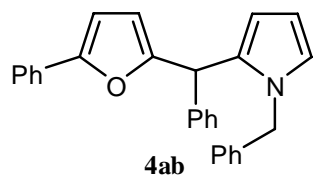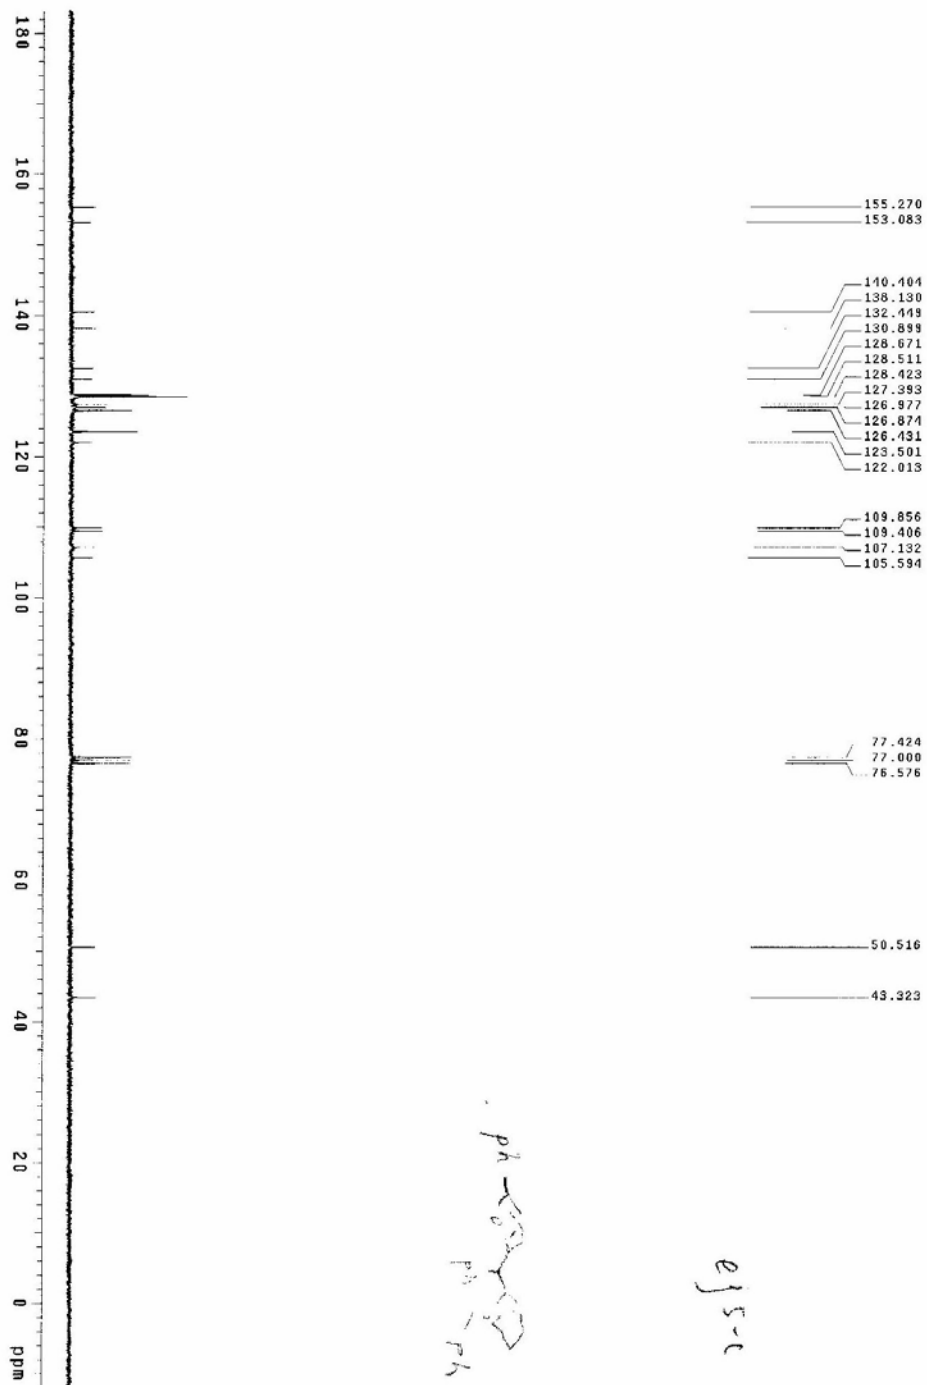



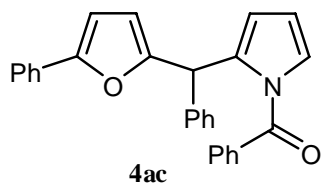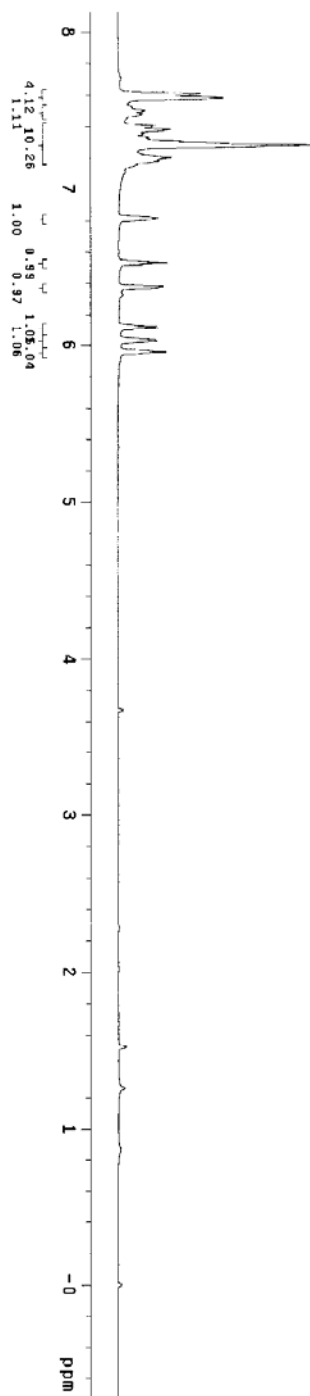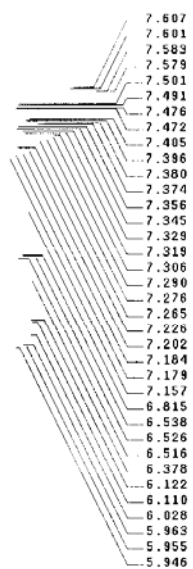

Ph - C<sub>6</sub>H<sub>5</sub>  
Ph - C<sub>6</sub>H<sub>5</sub>  
Ph - C<sub>6</sub>H<sub>5</sub>  
Ph - C<sub>6</sub>H<sub>5</sub>  
Ph - C<sub>6</sub>H<sub>5</sub>

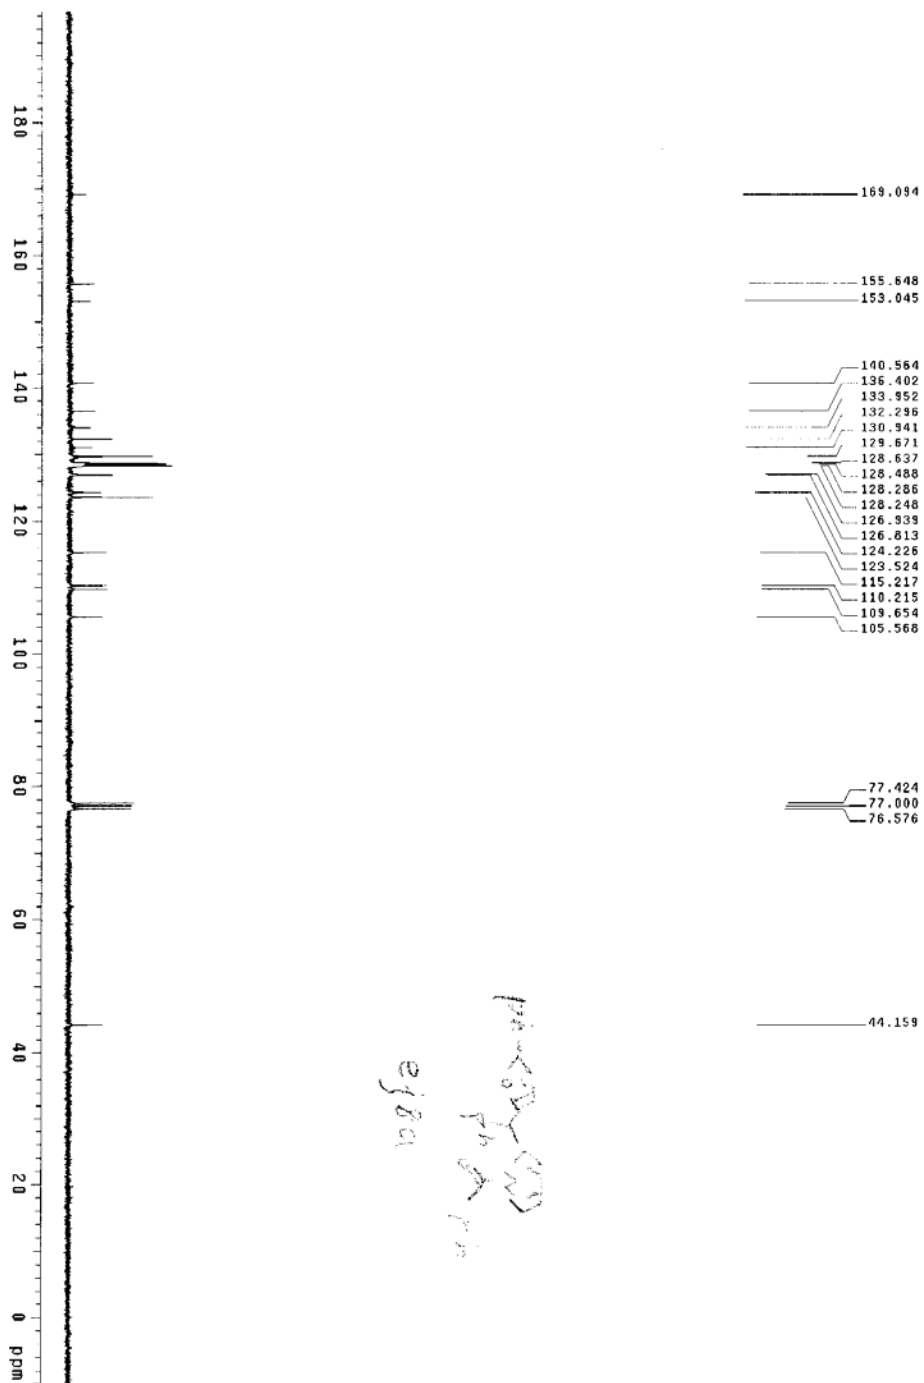

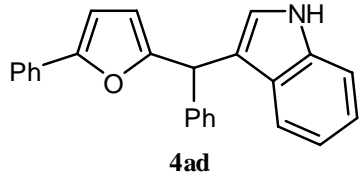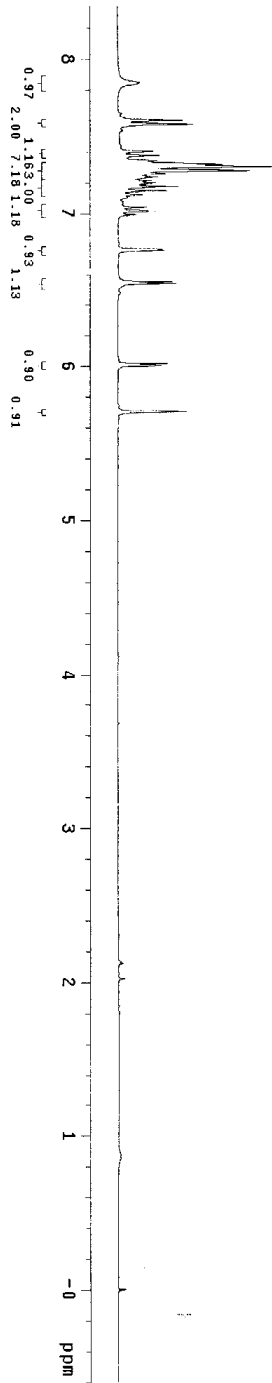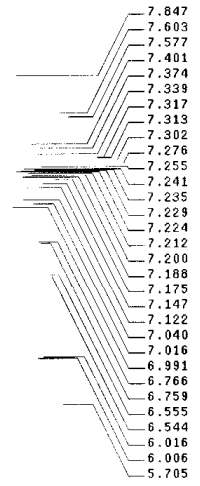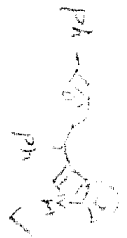

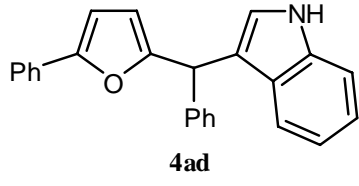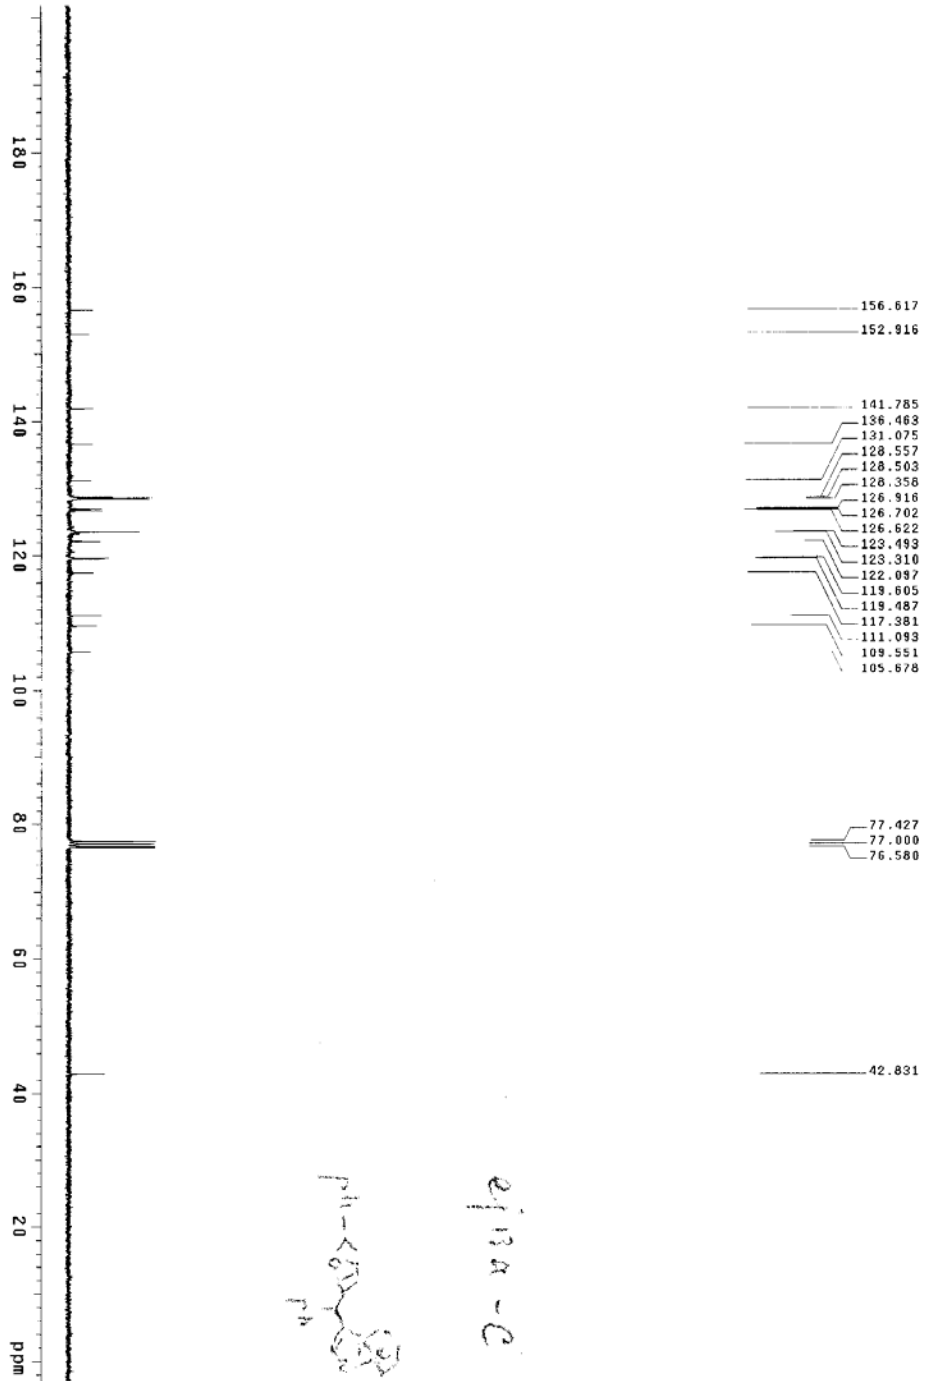

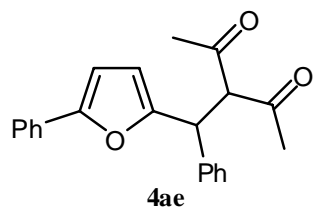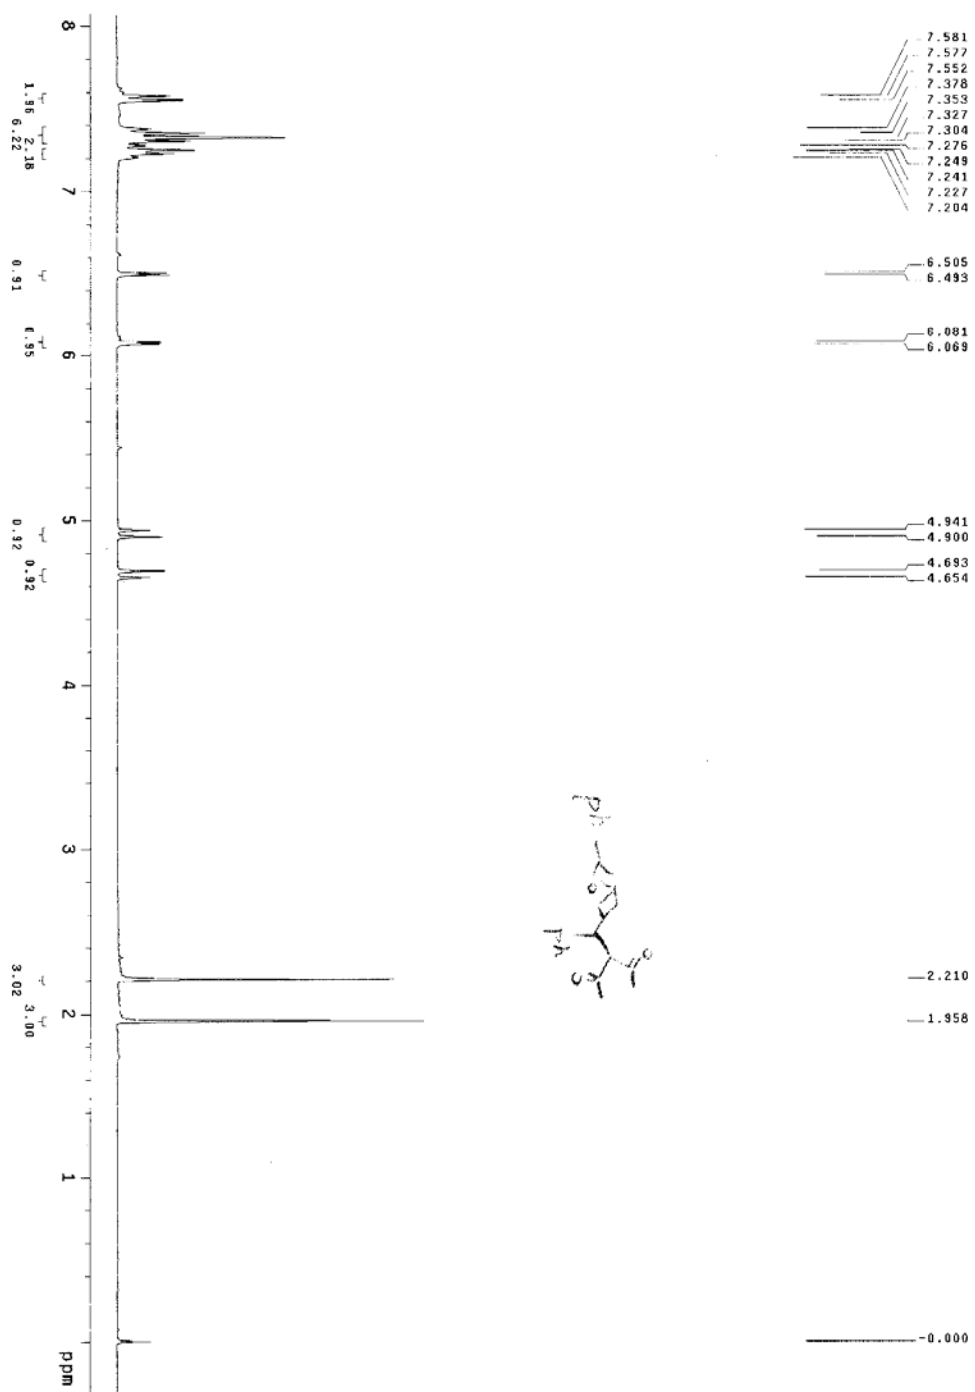

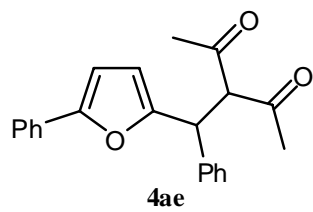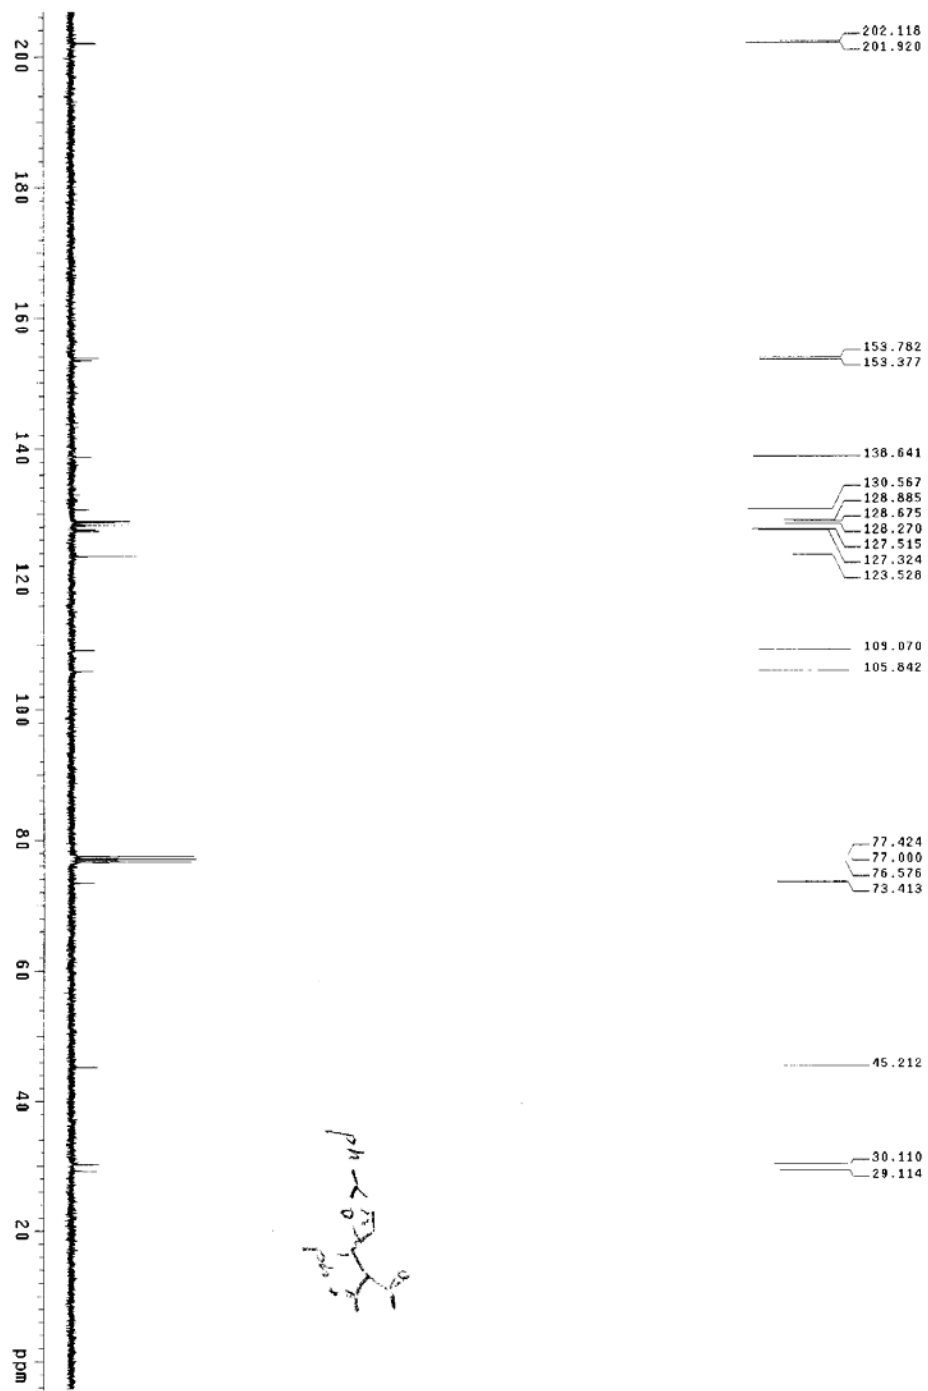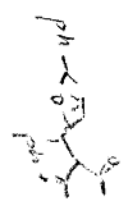

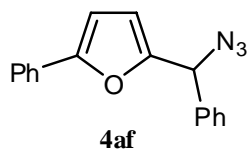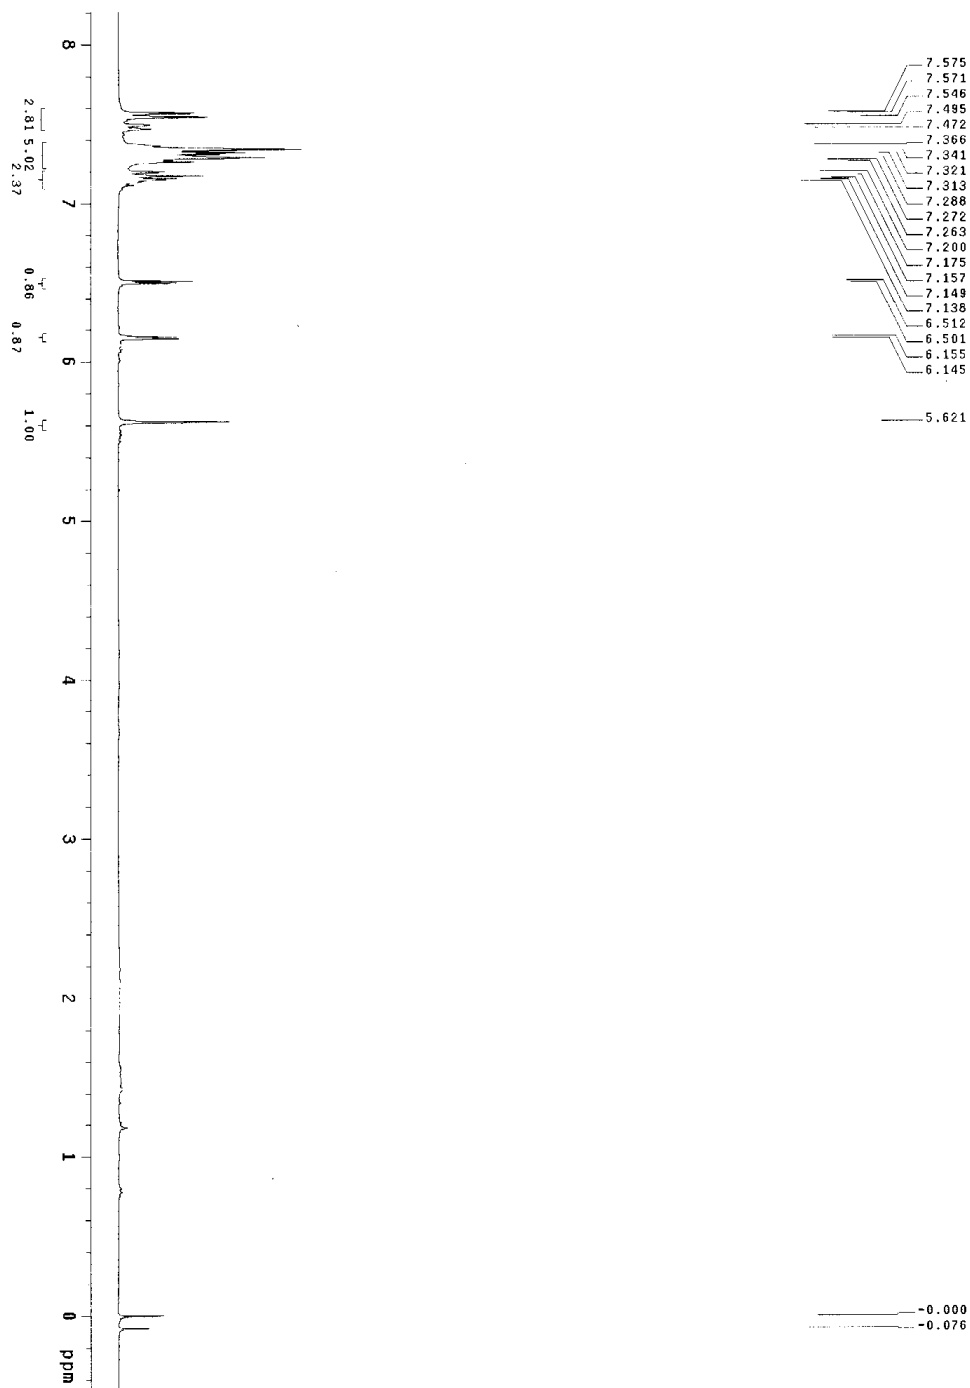

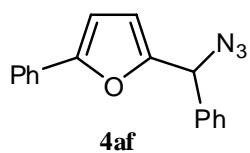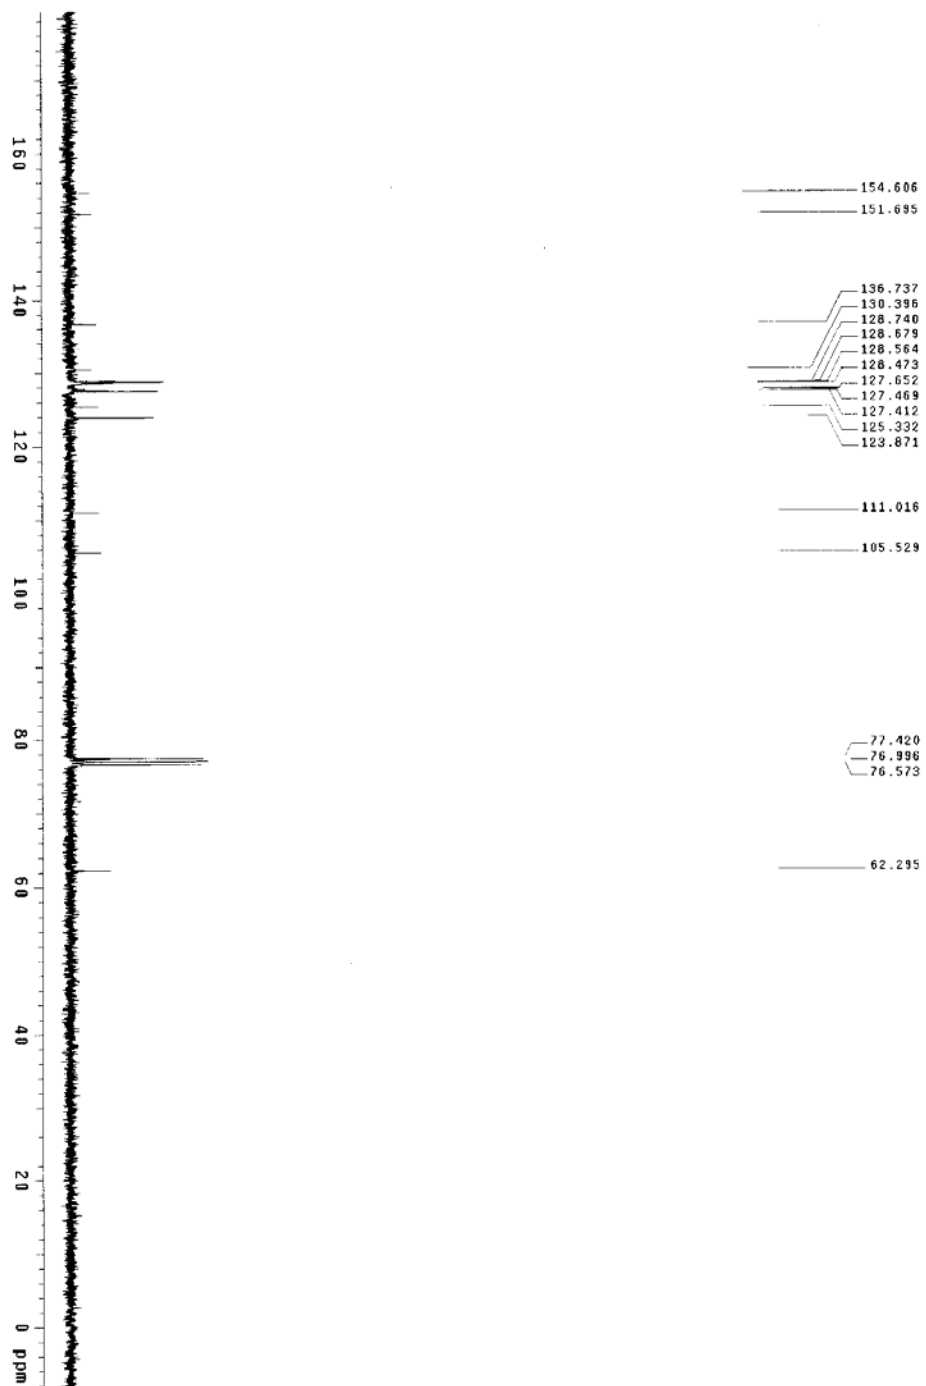



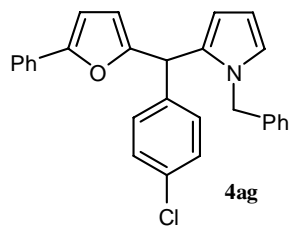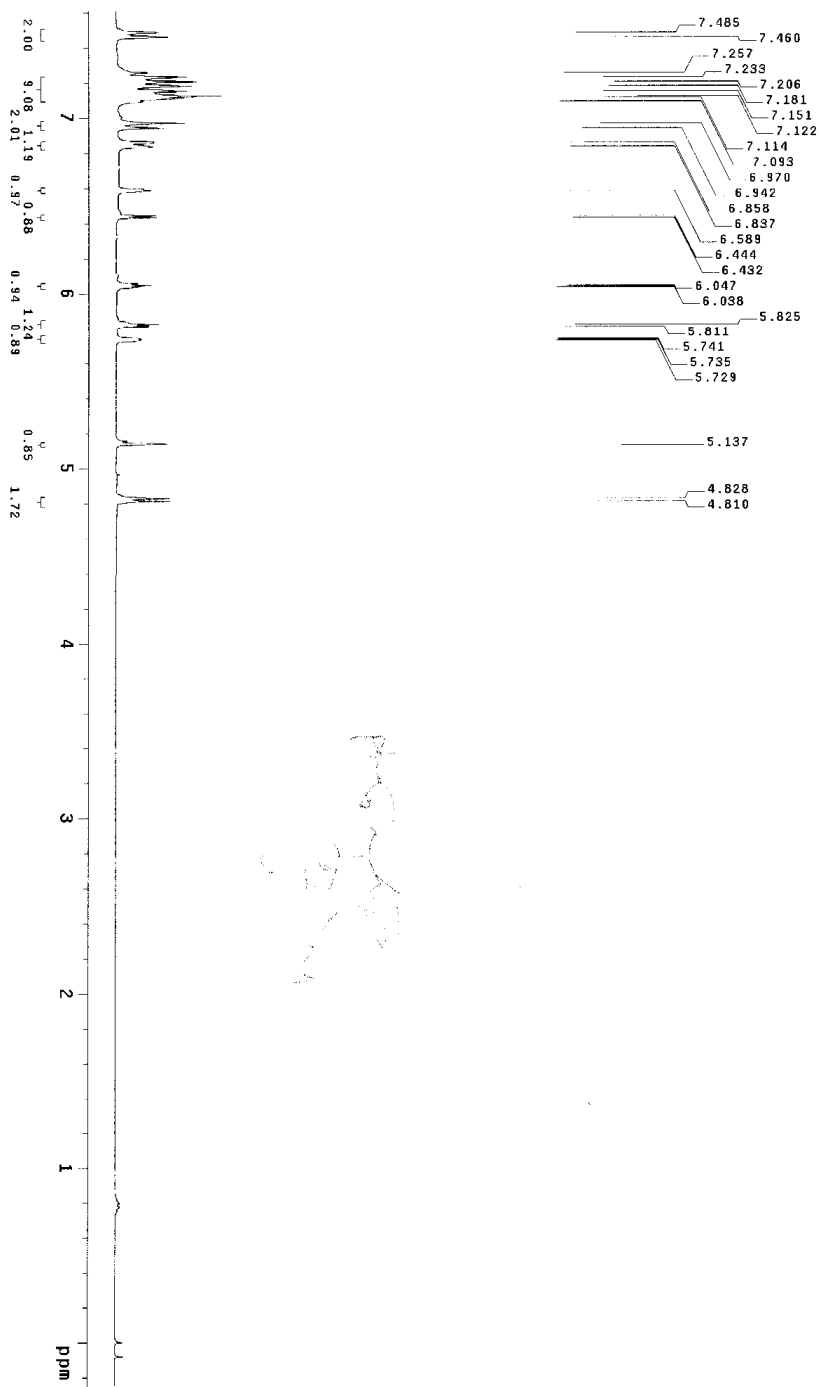

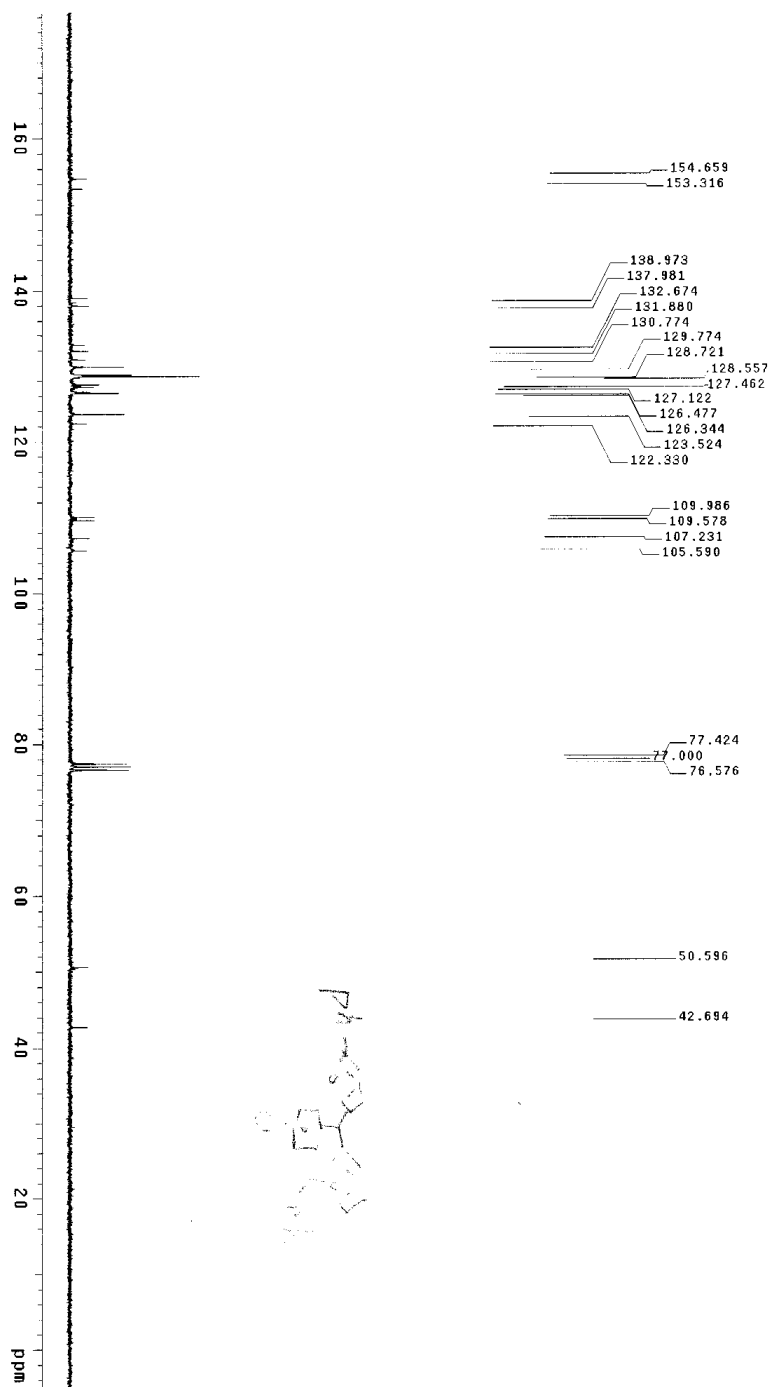

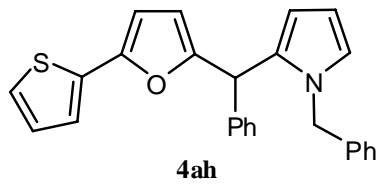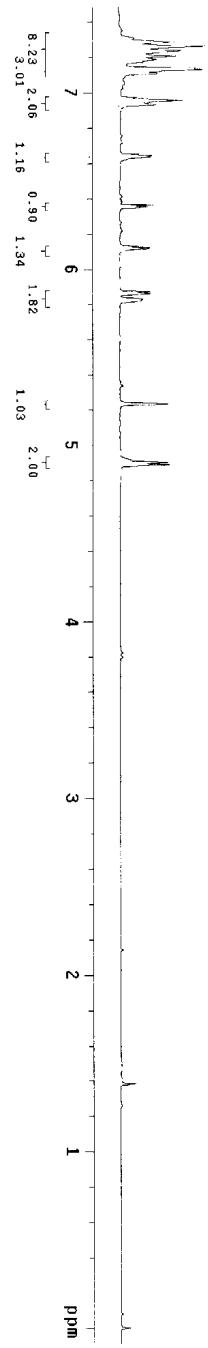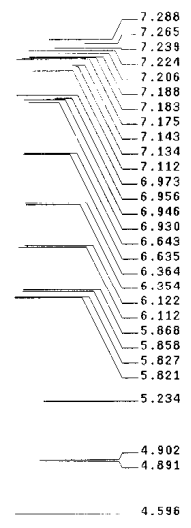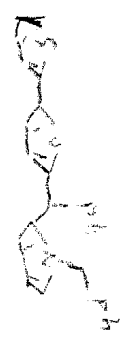

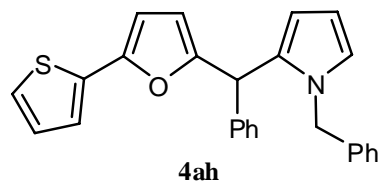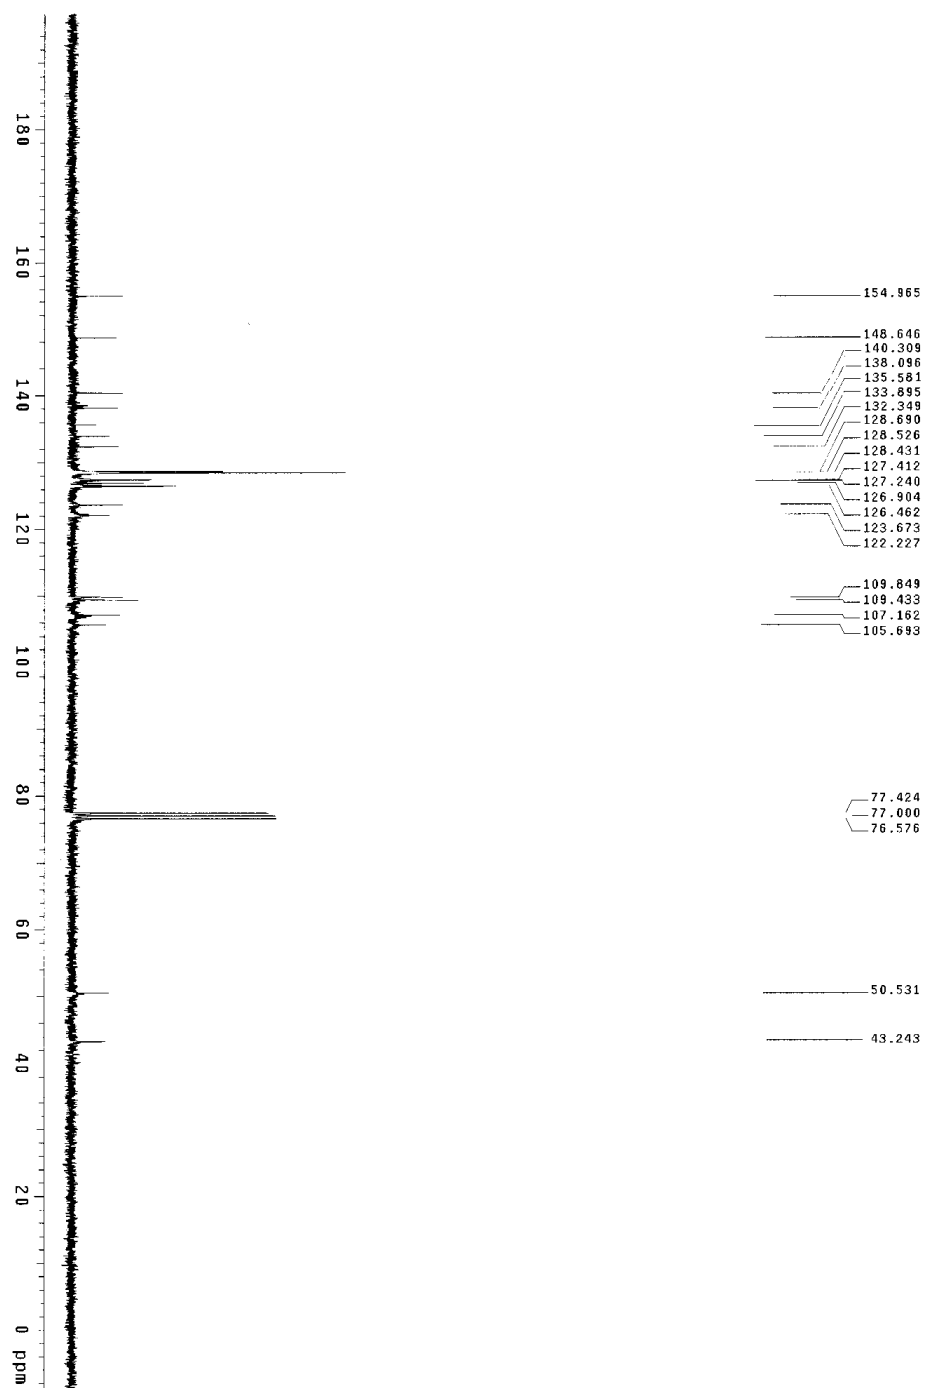

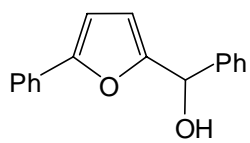

3a

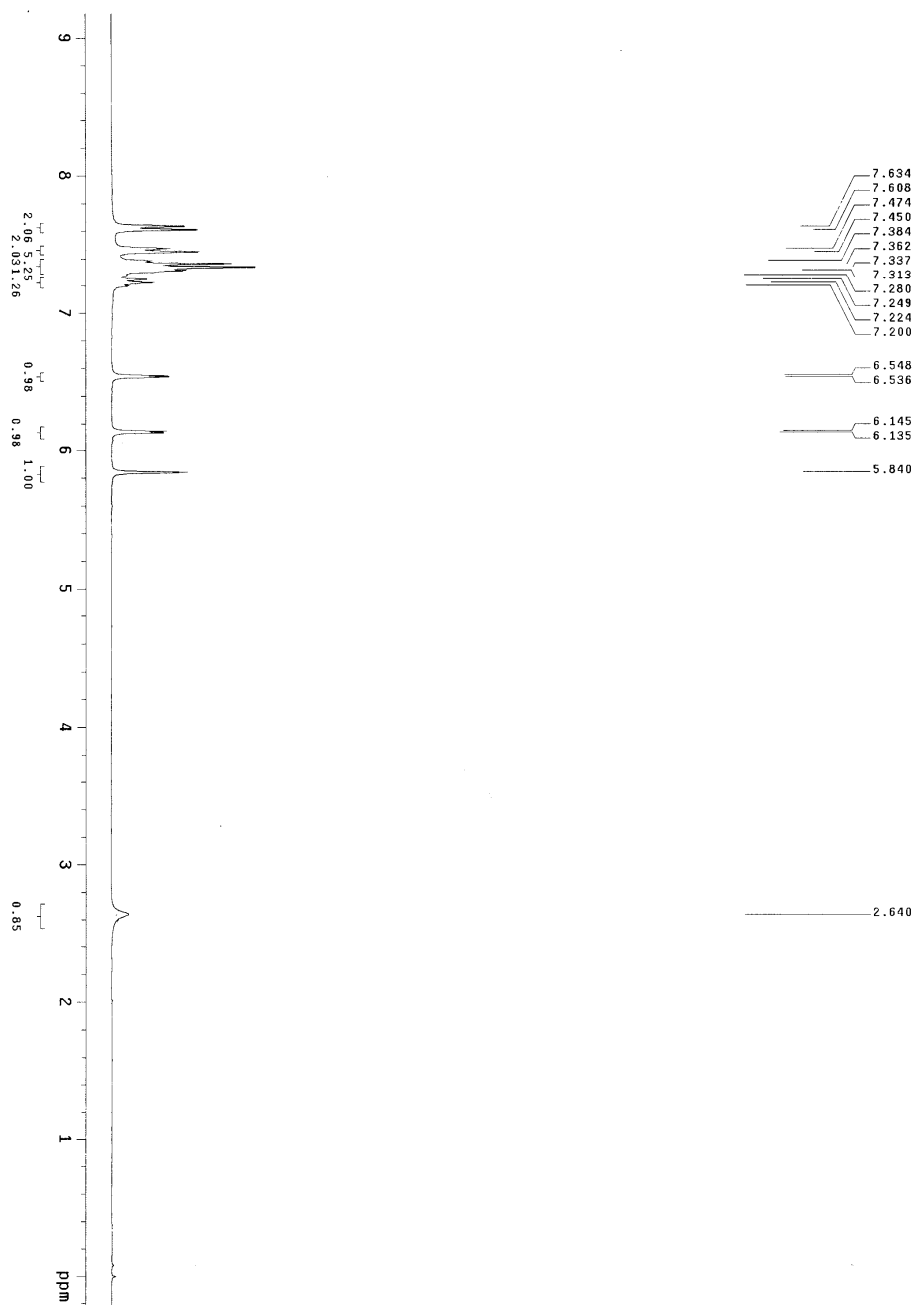

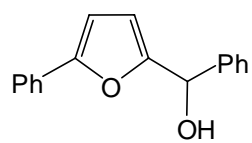

3a

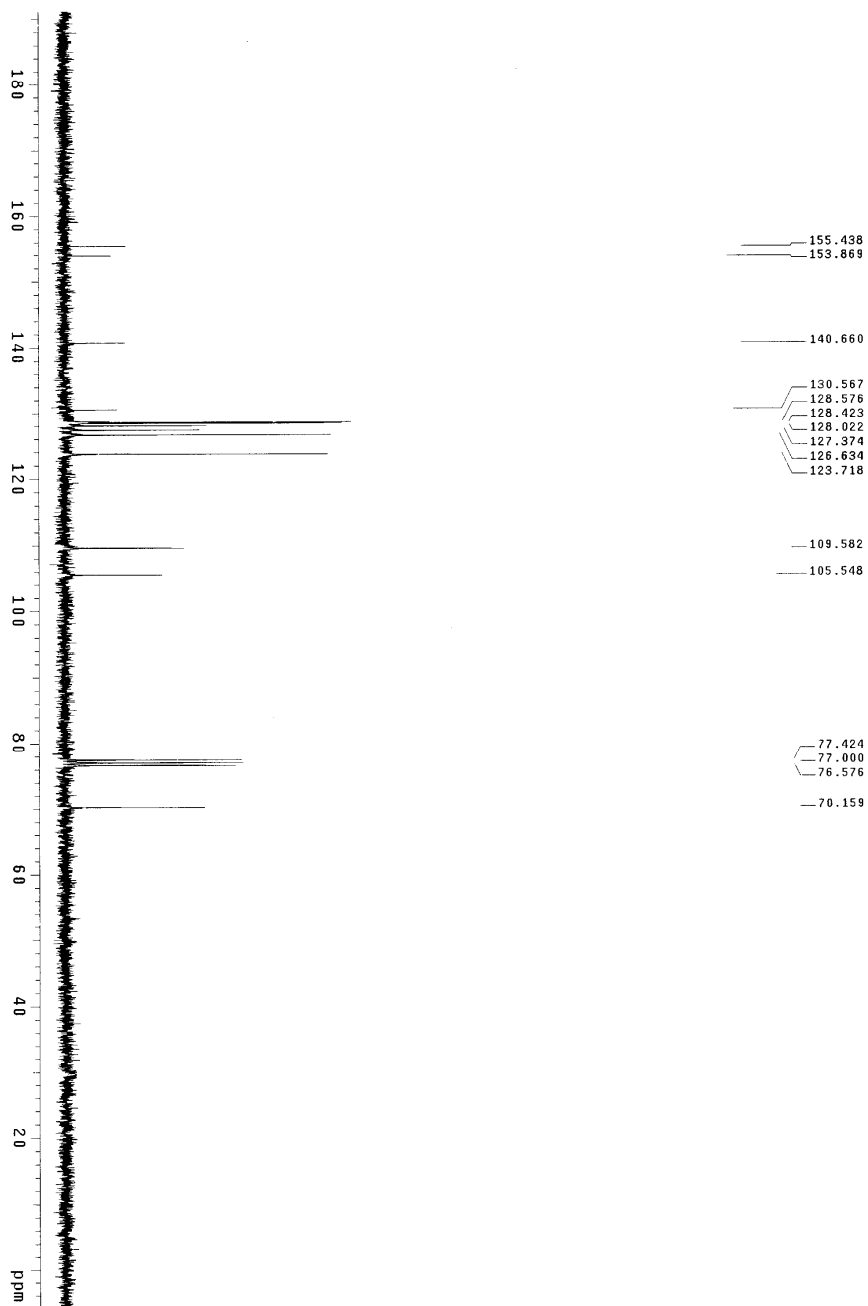

Supplement: b905332h.pdf [file b905332h.pdf]
